# 1 **Connectome architecture, gene expression and functional co-activation** 2 **shape the propagation of misfolded proteins in neurodegenerative disease**

3 Ying-Qiu Zheng<sup>1</sup>, Yu Zhang<sup>1,2</sup>, Yvonne Yau<sup>1</sup>, Yashar Zeighami<sup>1</sup>, Kevin Larcher<sup>1</sup>,  
4 Bratislav Mišić<sup>1,\*†</sup>, and Alain Dagher<sup>1,\*†</sup>

5 <sup>1</sup>Montréal Neurological Institute, McGill University, Montréal, Canada

6 <sup>2</sup>Centre de Recherche de l'Institut Universitaire de Gériatrie de Montréal, Montréal, Canada

7 \*Correspondence to: [bratislav.misic@mcgill.ca](mailto:bratislav.misic@mcgill.ca) or [alain.dagher@mcgill.ca](mailto:alain.dagher@mcgill.ca)

8 †These authors contributed equally to this work

## 9 **ABSTRACT**

10 It is becoming increasingly clear that brain network organization shapes the course and expression  
11 of neurodegenerative diseases. Parkinson's disease (PD) is marked by progressive spread of atrophy  
12 from the midbrain to subcortical structures and eventually, to the cerebral cortex. Recent discoveries  
13 suggest that the neurodegenerative process involves the misfolding of endogenous proteins ( $\alpha$ -  
14 synuclein) and prion-like spread of these pathogenic proteins via axonal projections. However, the  
15 mechanisms that translate local "synucleinopathy" to large-scale network dysfunction and atrophy  
16 remain unknown. Here we use an agent-based epidemic spreading model to integrate structural  
17 connectivity, functional connectivity and gene expression, and to predict sequential volume loss  
18 due to neurodegeneration. We demonstrate three key findings. First, the dynamic model replicates  
19 the spatial distribution of empirical atrophy identified in an independent dataset of PD patients.  
20 Second, the model implicates the substantia nigra as the disease epicenter, consistent with previous  
21 literature. Third, we reveal a significant role for both connectome topology and spatial embedding  
22 (geometry) in shaping the distribution of atrophy. Gene expression and functional co-activation  
23 further amplify the course set by connectome architecture. Altogether, these results support the

24 notion that the progression of neurodegenerative disease is a multifactorial process that depends  
25 on both cell-to-cell spreading of misfolded proteins and local regional vulnerability. The model  
26 proves powerful in modelling neurodegeneration and provides insights into developing preventative  
27 procedures.

## 28 INTRODUCTION

29 Neurodegenerative diseases such as Alzheimer's Disease (AD), Parkinson's Disease (PD), and  
30 Amyotrophic Lateral Sclerosis, are a major cause of psychosocial burden and mortality, and lack  
31 specific therapy. Until recently, the mechanism of progressive neuronal death in these conditions  
32 was unknown. However, converging lines of evidence from molecular, animal and human post-  
33 mortem studies point to misfolded neurotoxic proteins that propagate through the central nervous  
34 system via neuronal connections (Brundin and Melki 2017; Guo and Lee 2014; Polymenidou and  
35 Cleveland 2012; Jucker and Walker 2013; Brettschneider et al. 2015; Walsh and Selkoe 2016).  
36 These pathogenic misfolded disease-specific proteins function as corruptive templates that induce  
37 their normal protein counterparts to adopt a similar conformational alteration, analogous to the self-  
38 replication process of misfolded proteins in prion diseases. Examples include amyloid  $\beta$ -protein  
39 ( $A\beta$ ) and *tau* in AD and  $\alpha$ -synuclein in PD. The misfolded proteins can deposit into insoluble  
40 aggregates and progressively spread to interconnected neuronal populations through synaptic con-  
41 nections. The model of a propagating proteinopathy remains controversial however (Surmeier et al.  
42 2017), and direct evidence in humans remains mostly circumstantial (Kordower et al. 2008).

43 The prion hypothesis suggests that propagation dynamics in neurodegenerative diseases may be  
44 modeled using methods derived from infectious disease epidemiology. Just as infectious diseases  
45 spread via social networks, misfolded proteins propagate via the brain's connectome. There are  
46 different approaches for modeling epidemic spread over a network. In simple compartmental  
47 (equation-based) models, disease in any region is modeled as a concentration (e.g. of misfolded  
48 protein) and propagation obeys the law of mass effect with first order kinetics (Raj et al. 2012;  
49 Iturria-Medina et al. 2014). The epidemic is defined by a series of differential equations. Such  
50 models are easily solved mathematically but have limited explanatory power. Another approach is

51 the agent-based model (Frias-Martinez et al. 2011), in which the infectious state of each individual  
52 agent and its motility are simulated, and where simple local interactions can translate into complex  
53 global behavior. They have the advantage of easily incorporating additional emergent properties of  
54 a system as the epidemic spreads – for example a brain region may lose its ability to propagate the  
55 disease once it is severely affected. They also easily incorporate differences among agents (e.g. in  
56 susceptibility to infection or mobility), and are useful for testing interventions (e.g. vaccination).  
57 Agent-based models tend to be computationally demanding and are limited in their ability to  
58 model epidemics on large or complex networks. Metapopulation structured models are hybrids  
59 in which disease dynamics within subpopulations follow a compartmental model, while disease  
60 spread from region to region depends on network properties (Balcan et al. 2010). They are also  
61 less computationally expensive and more tractable than pure agent-based models.

62 Here we propose a Susceptible-Infectious-Removed (S-I-R) metapopulation structured model  
63 on a brain network to model the spreading of pathological proteins in neurodegenerative diseases  
64 (FIG. 1). The agents are individual proteins. The population is split into S, the portion yet  
65 to be infected (normal proteins); I, the portion capable of transmitting the infection (misfolded  
66 proteins); and R, the portion no longer active in the spreading (metabolized and cleared proteins).  
67 We took PD as an example to show how a S-I-R metapopulation structured model can track the  
68 spreading of misfolded  $\alpha$ -synuclein, the pathological fibrillar species of endogenous  $\alpha$ -synuclein  
69 suggested to be responsible for PD pathology. Although convincing evidence from animal (Luk  
70 et al. 2012; Mougenot et al. 2012; Goedert et al. 2013; Masuda-Suzukake et al. 2013; Peelaerts  
71 et al. 2015; Rey et al. 2016; Brundin and Kordower 2012) and neuroimaging studies (Zeighami  
72 et al. 2015; Yau et al. 2018) supports the propagation of misfolded and neurotoxic  $\alpha$ -synuclein,  
73 other mechanisms may also drive PD pathology, including cell-autonomous factors, dependent  
74 on gene expression, that modulate regional neuronal vulnerability (Surmeier et al. 2017). If  
75 the pathology of neurodegenerative diseases is indeed driven by progressive accumulation and  
76 propagation of disease-related proteins, such a model should recapitulate the spatial pattern of  
77 regional neurodegeneration in patients thereby providing converging and independent evidence for

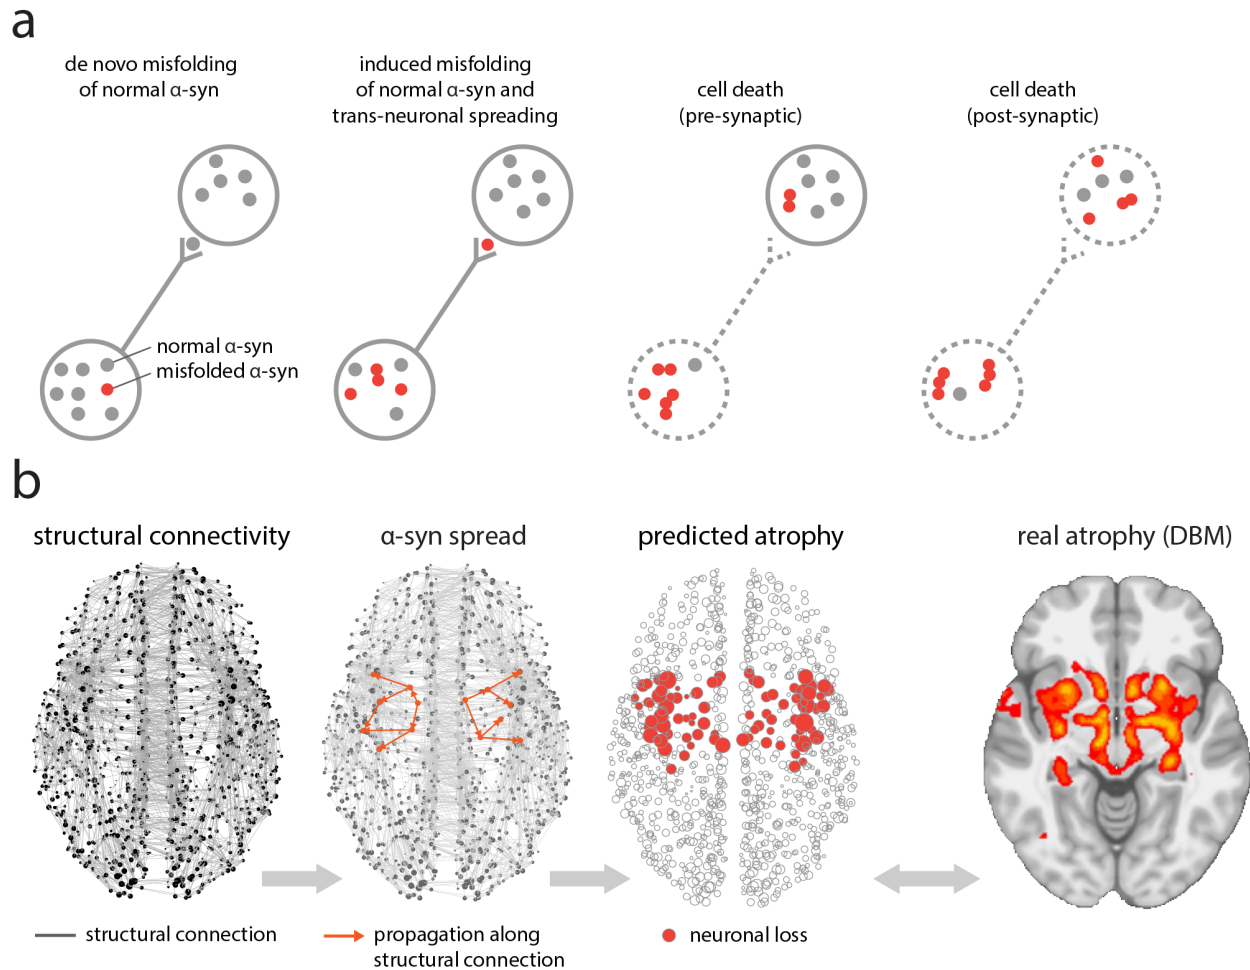

**Fig. 1. Agent-based S-I-R model** | (a) Misfolded  $\alpha$ -synuclein (red) may diffuse through synaptic connections into adjacent neurons, causing misfolding of normal  $\alpha$ -synuclein (gray). Accumulation of misfolded  $\alpha$ -synuclein induces neuronal loss. (b) At the macroscopic level, misfolded  $\alpha$ -synuclein propagates via structural connections, estimated from diffusion-weighted imaging. Simulated neuronal loss (atrophy) is compared against empirical atrophy, estimated from PD patients using deformation-based morphometry (DBM).

78 the pathogenic spread hypothesis. We also investigate whether selective vulnerability may influence  
79 the spatial patterning of the disease.

80 Using brain imaging data from Parkinson's Progression Markers Initiative (PPMI) (Marek et al.  
81 2011) and Human Connectome Project (HCP) (Van Essen et al. 2013), and gene expression profiles  
82 from the Allen Human Brain Atlas (AHBA) (Hawrylycz et al. 2012), we constructed a S-I-R  
83 metapopulation structured model to simulate the spreading of misfolded  $\alpha$ -synuclein and regional  
84 accrual of neuronal loss (atrophy). Measurements of empirical atrophy in PD patients were derived

85 from structural magnetic resonance imaging (MRI) scans in PPMI and healthy connectomes that  
86 characterize the mobility pattern of the agents ( $\alpha$ -synuclein) were constructed from HCP, while  
87 local gene expression of *SNCA* and *GBA* that modulate synuclein formation and degradation were  
88 derived from AHBA. Simulated regional atrophy derives from (1) the accumulation of misfolded  $\alpha$ -  
89 synuclein aggregates and (2) deafferentation due to neurodegeneration in interconnected neuronal  
90 populations. The study is organized as follows: first, we determine whether the model replicates  
91 empirically measured brain atrophy in PD; second, we identify the likely epicenter for disease  
92 initiation; third, we assess whether the disease spread is driven by non-cell-autonomous factors  
93 (structural connectivity) and cell-autonomous vulnerability (regional gene expression data); finally,  
94 we assess the role of activity-dependent spread of  $\alpha$ -synuclein by incorporating resting state  
95 functional connectivity information into the model.

## 96 RESULTS

### 97 Model Construction

- 98 • *Structural connectivity.* Diffusion-weighted MRI data from N=1027 healthy participants  
99 was used to construct the anatomical network for  $\alpha$ -synuclein propagation (source: HCP,  
100 2017 S1200 release; (Van Essen et al. 2013)). Adjacency matrices were reconstructed  
101 using deterministic streamline tractography (Yeh et al. 2013). A group consensus structural  
102 connectivity matrix was constructed by selecting the most commonly occurring edges  
103 averaged across all subjects, resulting in a binary density of 35% (Mišić et al. 2015; Mišić  
104 et al. 2018).
- 105 • *Functional connectivity.* Resting-state functional MRI (fMRI) data from N=496 healthy  
106 participants (source: HCP, 2015 S500 release; (Van Essen et al. 2013)) was used to construct  
107 the functional connectome. Individual functional connectivity matrices were calculated  
108 using Pearson's correlation coefficient and then normalized using Fisher's z transform. A  
109 group correlation matrix was then constructed by first averaging the z-score connectivity  
110 matrices across subjects, and then converted back to correlation values using the inverse  
111 transformation. Negative correlation values in the resultant group connectivity matrix were

- 112 set to zero.
- 113 • *Gene expression.* mRNA transcription (measured using in-situ hybridization) profiles of  
114 *SNCA* and *GBA* were averaged across samples in the same brain parcel and across the six  
115 subjects in the AHBA dataset. These gene expression profiles determine the local synthesis  
116 and degradation of  $\alpha$ -synuclein (see *Methods*).
  - 117 • *Atrophy.* An atrophy map was derived from T1-weighted MRI scans of 237 PD patients and  
118 118 age-matched healthy controls (source: PPMI; (Marek et al. 2011)). For each participant  
119 (patient or healthy control), the Deformation-based Morphometry (DBM) value in each  
120 parcel was estimated to quantify the local volume change, on which an un-paired t-test was  
121 conducted between the patients and healthy controls. The resulting t-statistics were taken  
122 as the measure of regional atrophy (Zeighami et al. 2015).

123 The brain MRI template was parcellated according to an anatomical segmentation-based atlas,  
124 featuring 68 bilateral cortical and 15 subcortical regions (Desikan et al. 2006; Cammoun et al. 2012;  
125 Keuken et al. 2014). As only two of the six post-mortem AHBA brains have right hemispheric data  
126 available, and diffusion tractography is prone to errors in detecting interhemispheric connections,  
127 we simulated propagation using only the left hemisphere from the model, yielding 42 regions in  
128 total.

129 *Synuclein propagation.* We posited that regional expression level of endogenous  $\alpha$ -synuclein  
130 already existing in the brain before disease onset may bias the trajectory of misfolded  $\alpha$ -synuclein  
131 propagation. Therefore, to estimate regional density of endogenous  $\alpha$ -synuclein in healthy brain,  
132 we set up a process that used generic information only to simulate the population growth of normal  
133  $\alpha$ -synuclein agents. Normal agents in region  $i$  are synthesized in each unit area ( $1\text{mm}^3$  voxel) per  
134 unit time with probability  $\alpha_i$  (the synthesis rate in region  $i$ ). Meanwhile, any agent already existing  
135 in region  $i$  can: (a) exit region  $i$  and move into the edges it connects to with probabilities proportional  
136 to the corresponding connection strengths (densities of the fiber tracts); (b) remain in region  $i$  where  
137 it may be metabolized with probability  $\beta_i$  (the clearance rate in region  $i$ ). Likewise, the agents in  
138 edge  $(i, j)$  can (a) exit edge  $(i, j)$  to enter region  $j$  with probability  $1/l_{ij}$  where  $l_{ij}$  is the mean length of

139 the fiber tracts between region  $i$  and  $j$ , reflecting our intuition that agents in longer edges have lower  
140 probability of exiting the edge; (b) remain in edge  $(i, j)$  with probability  $1 - 1/l_{ij}$ . The synthesis  
141 rate  $\alpha_i$  and clearance rate  $\beta_i$  in region  $i$  are the *SNCA* and *GBA* expression z-scores respectively  
142 in region  $i$  converted to  $[0, 1]$  using the standard normal cumulative distribution function. The  
143 system has only one stable point which can be found numerically (see *Supplementary Information*),  
144 suggesting that the growth of  $\alpha$ -synuclein will deterministically converge to an equilibrium state  
145 set by the connectome and the gene expression profiles. The regional density of normal agents  
146 (number of agents per voxel) solved at the stable point was taken as the initial state of the misfolded  
147  $\alpha$ -synuclein spreading process.

148 *Synuclein misfolding.* We next initiated the pathogenic spread by injecting misfolded  $\alpha$ -  
149 synuclein agents into the seed region, here chosen as the substantia nigra. The updating rules  
150 of normal agents (above) were adapted to account for their susceptibility to infection from con-  
151 tact with misfolded agents. Apart from the rules defined in the aforementioned growth process,  
152 normal (susceptible) agents in region  $i$  that survive degradation can be infected with probability  
153  $\gamma_i$  thereby becoming misfolded (infected) agents (see *Methods*). In the absence of any molecular  
154 evidence to the contrary, misfolded agents are updated with the same mobility (exiting/remaining  
155 in regions/edges) and degradation (clearance rate) as normal agents. The new system seeded with  
156 misfolded  $\alpha$ -synuclein has two fixed points: (1) one represents the scenario in which misfolded  
157  $\alpha$ -synuclein dies out, cleared by metabolic mechanisms before being able to transmit the infection to  
158 the entire population; (2) the other represents a major outbreak of misfolded  $\alpha$ -synuclein, spreading  
159 to other regions via physical connections, causing further misfolding of endogenous  $\alpha$ -synuclein  
160 and widespread propagation (FIG. S1). In this model, neither the injection number of misfolded  
161  $\alpha$ -synuclein agents nor the choice of seed region will affect the magnitude of misfolded  $\alpha$ -synuclein  
162 accumulation at the fixed point; rather, they determine whether the spreading process converges to  
163 the epidemic scenario or dies out quickly. See TABLE. S1 for the full list of parameters and their  
164 explanations.

## 165 Simulated neuronal loss replicates the spatial pattern of atrophy

166 We first investigated whether misfolded  $\alpha$ -synuclein spreading on the healthy connectome can  
167 replicate the spatial patterning of atrophy observed in PD patients. We simulated the propagation  
168 of misfolded agents and the accrual of atrophy due to the toxic accumulation of the aggregates.  
169 Two factors that may induce neuronal loss were accounted for: (1) the accumulation of misfolded  
170  $\alpha$ -synuclein that will cause region-specific cell death directly; (2) atrophy due to deafferentation  
171 secondary to cell death in connected regions. At each time point, we compared the relative  
172 magnitude of simulated atrophy with the spatial pattern of empirical atrophy using Spearman's  
173 rank correlation coefficient, yielding the model fit as a function of time  $t$ .

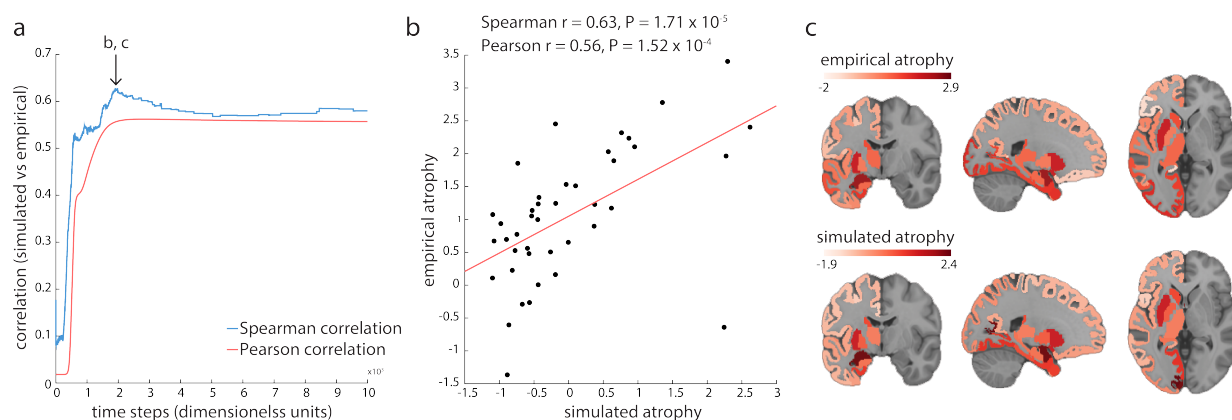

**Fig. 2. Model fit** | (a) Correlations between simulated atrophy and empirical atrophy derived from PD patient DBM maps up to  $t = 10^4$ . Correlations are shown as a function of simulation time. After reaching the peak value ( $r = 0.63, r = 1.71 \times 10^{-5}$ ), the model fit slightly drops and finally stabilizes. In scanning along  $t$  to find the peak value, beginning timeframes were discarded to avoid picking up spurious correlation value as the peak (See *Supplementary Information*). See FIG. S2 for correlations up to  $t = 10^5$ . (b) Model fit at the peak of Spearman's correlation taken from panel a. Using Pearson's correlation coefficients yielded comparable results ( $r = 0.56, p = 1.52 \times 10^{-4}$ ). Values shown in the axes are normalized. The outlier at the bottom right is the nucleus accumbens (for a possible explanation see *Discussion*). (c) Simulated atrophy and empirical atrophy plotted on the ICBM152 standard MNI template. The slices were chosen at  $x=-22, y=-7, z=0$  (MNI coordinates).

174 As the misfolded agents propagate and accumulate in the system, the model fit increases up  
175 to a maximum value ( $r=0.63, p=1.71 \times 10^{-5}$ , FIG. 2(a)) after which it drops slightly and stabilizes.  
176 Note that we discarded early-spreading timeframes when scanning along  $t$  to find the maximum



177 correlation value (see *Supplementary Information*) to avoid picking up spurious model fit. We posit  
178 that the slight decrease following the peak occurs because simulated atrophy becomes increasingly  
179 widespread as the propagation of misfolded agents progresses, while the empirical atrophy was  
180 derived from *de novo* PD patients at their first-visit in PPMI. FIG. 2(b) shows the linear relationship  
181 between simulated and empirical atrophy across all nodes at peak fit, while FIG. 2(c) shows the  
182 spatial correspondence between simulated and empirical atrophy. Model fit assessed by Pearson's  
183 correlation coefficient produced comparable results ( $r=0.56$ ,  $p=1.52\times 10^{-4}$  at the peak, FIG. 2(a)(b)).  
184 Interestingly, the model fit finally stabilizes with increasing  $t$  as the regional accumulation of  
185 misfolded  $\alpha$ -synuclein approximates the stable point (see FIG. S2 for model fit up to  $10^5$  time  
186 steps), a finding that mirrors recent discoveries in animal models that  $\alpha$ -synuclein eventually ceases  
187 to propagate in later stages (Rey et al. 2018). We also note that misfolded  $\alpha$ -synuclein arrival time  
188 at each brain region follows the well-established Braak stages of PD (Braak et al. 2003; Braak et al.  
189 2004) (FIG. S3).

190 We next investigated if the pattern of model fit as a function of  $t$  and its peak value were  
191 consistent across variations in structural network densities. We selected varying subsets of the  
192 most commonly occurring edges in the individual structural connectivity matrices, varying the  
193 binary density of the group structural network matrix from 25% to 45%. We then simulated the  
194 spreading processes on each network, derived the neuronal loss at each region and compared it with  
195 the empirical atrophy pattern using Spearman's rank correlation coefficient. All the simulations  
196 yielded comparable model fits with the peak correlation values consistently around 0.6 (FIG. 3,  
197 blue curve), suggesting that the S-I-R metapopulation structured model is robust to variations in  
198 network densities. Notably, we also assessed the Spearman's correlation between the regional  
199 density of misfolded  $\alpha$ -synuclein and the empirical atrophy pattern. Across the same set of  
200 networks, simulated atrophy consistently provides better fits with the empirical atrophy than the  
201 regional density of misfolded  $\alpha$ -synuclein (FIG. 3, red curve), indicating that the cell death induced  
202 by  $\alpha$ -synuclein and deafferentation is a better measure to model regional atrophy accrual than the  
203 mere accumulation of misfolded  $\alpha$ -synuclein.

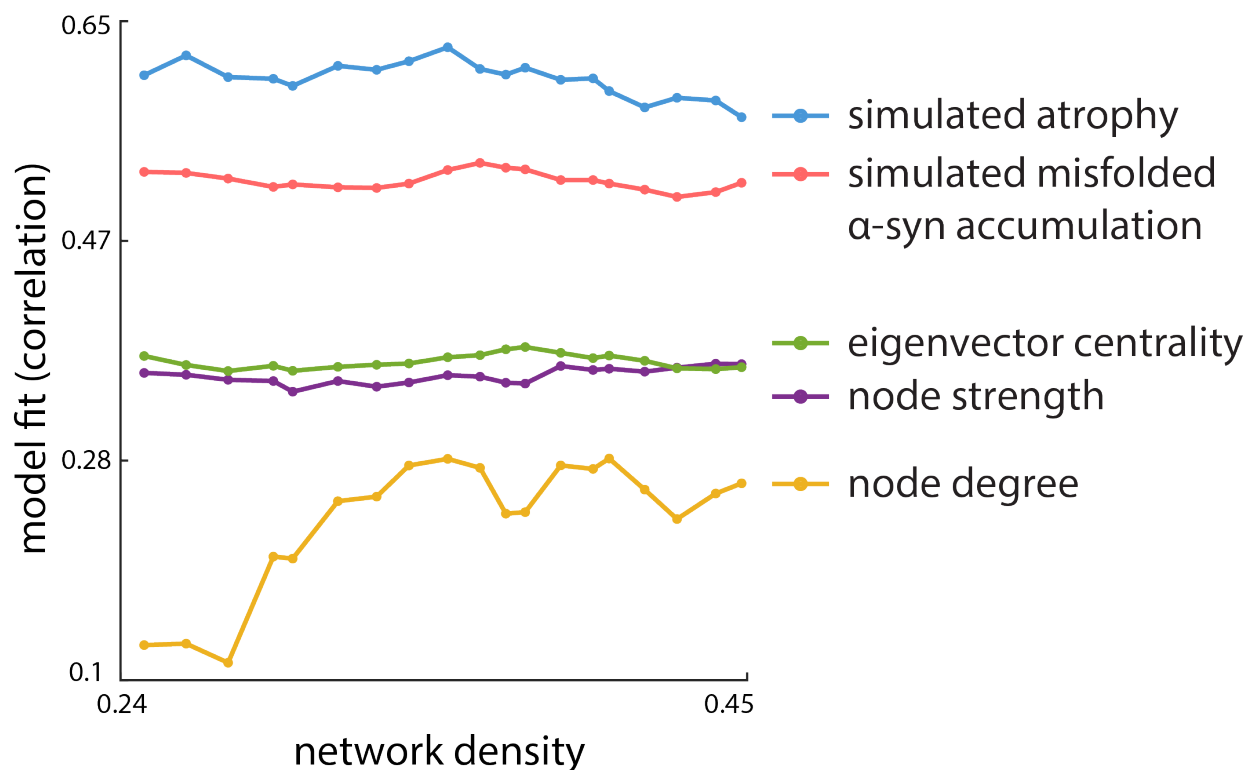

**Fig. 3. The full dynamic model outperforms static network measures across multiple network densities** | The full spread model has more predictive power than static topological metrics, including node degree (yellow), node strength (purple) and eigenvector centrality (green). Moreover, simulated atrophy (blue) yielded higher correlation with empirical atrophy than the density of misfolded  $\alpha$ -synuclein (red, peak correlation along  $t$  at each density), suggesting that neuronal death induced by misfolded  $\alpha$ -synuclein is a better measure to model atrophy in PD than the mere accumulation of misfolded  $\alpha$ -synuclein. Model fit was assessed using Spearman's correlation coefficient. The overall pattern of results was consistent across multiple network densities. Using Pearson's correlation coefficient yielded similar results (FIG. S4).

204 Finally, we investigated whether the observed atrophy patterns could be directly reproduced from  
205 simpler topological measures, without invoking metapopulation dynamics. We first tested whether  
206 simple regional variation in *GBA* or *SNCA* expression are associated with regional variation in  
207 atrophy. Neither *GBA* nor *SNCA* expression profiles bear a strong association with the spatial map of  
208 empirical atrophy (*GBA*: Spearman's  $r=-0.2402$ ,  $p=0.1301$ ; Pearson's  $r=-0.3109$ ,  $p=0.0478$ ; *SNCA*:  
209 Spearman's  $r=-0.2385$ ,  $p=0.1330$ ; Pearson's  $r=-0.2824$ ,  $p=0.0736$ ). Next, we tested whether simple  
210 network metrics provide a comparable fit to the observed atrophy values. Structural connectivity  
211 dictates the mobility pattern of the agents such that hub regions have a higher probability of

212 misfolded  $\alpha$ -synuclein infiltration. We correlated the atrophy map with node-level network metrics  
213 including node degree, node strength, and eigenvector centrality at each network density ranging  
214 from 25% to 45%. Hubs, or nodes with greater degree connectivity or centrality, tend to be  
215 more atrophied (FIG. 3, green, purple and yellow curves), echoing the findings that hubs are  
216 often implicated in a host of brain disorders (Crossley et al. 2014). However, none of the metrics  
217 performed better than simulated atrophy from the metapopulation model in matching the spatial  
218 pattern of empirical atrophy. Altogether, these results suggest that the protein dynamics embodied  
219 by the S-I-R metapopulation structured model provide predictive power above and beyond network  
220 topology and gene expression.

### 221 **Identifying the disease epicenter**

222 We next investigate whether the model yielded a disease epicenter consistent with previous  
223 literature. In the aforementioned process of normal  $\alpha$ -synuclein growth, we solved the regional  
224 density of normal agents at the stable point as a baseline estimation of endogenous  $\alpha$ -synuclein  
225 level in healthy brains. Recent findings from animal studies have suggested that  $\alpha$ -synuclein  
226 expression level correlates with neuronal vulnerability in PD (Rey et al. 2018; Luna et al. 2018);  
227 likewise, in our model, higher regional abundance of normal  $\alpha$ -synuclein agents indicates greater  
228 likelihood of exposure to and growth of infectious agents, higher chance of disease transmission,  
229 and consequently, greater vulnerability to the accumulation of misfolded  $\alpha$ -synuclein.

230 We compared the regional density of normal  $\alpha$ -synuclein agents with the empirical selective  
231 vulnerability in patients to identify if highly vulnerable regions, such as substantia nigra, also  
232 manifest abundance of  $\alpha$ -synuclein. We find that, of the 42 left hemisphere regions, substantia nigra  
233 has the highest normal  $\alpha$ -synuclein level (FIG. 4, blue line). The elevated density of endogenous  
234  $\alpha$ -synuclein renders substantia nigra susceptible to the encroaching of infectious misfolded  $\alpha$ -  
235 synuclein in the model, increasing both its vulnerability to misfolded protein and its chance of  
236 acting as a disease epicenter. This corresponds with the clinical observations of Lewy body  
237 inclusions and dopaminergic neuron loss identified in substantia nigra of PD patients as well as  
238 its role in most of the presenting symptoms of the disease (Spillantini et al. 1998; Damier et al.

239 1999), supporting that substantia nigra is one of the most vulnerable regions to the epidemic attack  
 240 of misfolded  $\alpha$ -synuclein fibrils (Braak et al. 2004). Moreover, other basal ganglia regions have  
 241 relatively high levels of normal  $\alpha$ -synuclein at the equilibrium compared to cortical regions (caudate  
 242 ranks among the highest 42.9% of all the regions; putamen, 31.0%; pallidum, 28.6%), consistent  
 243 with their role in propagating the disease process to the cerebral cortex (Yau et al. 2018). These  
 244 findings suggest that our model can indeed represent regional variations in selective vulnerability  
 245 to the pathogenic attacks underlying PD progression by combining information from the healthy  
 246 connectome and *SNCA* and *GBA* expressions.

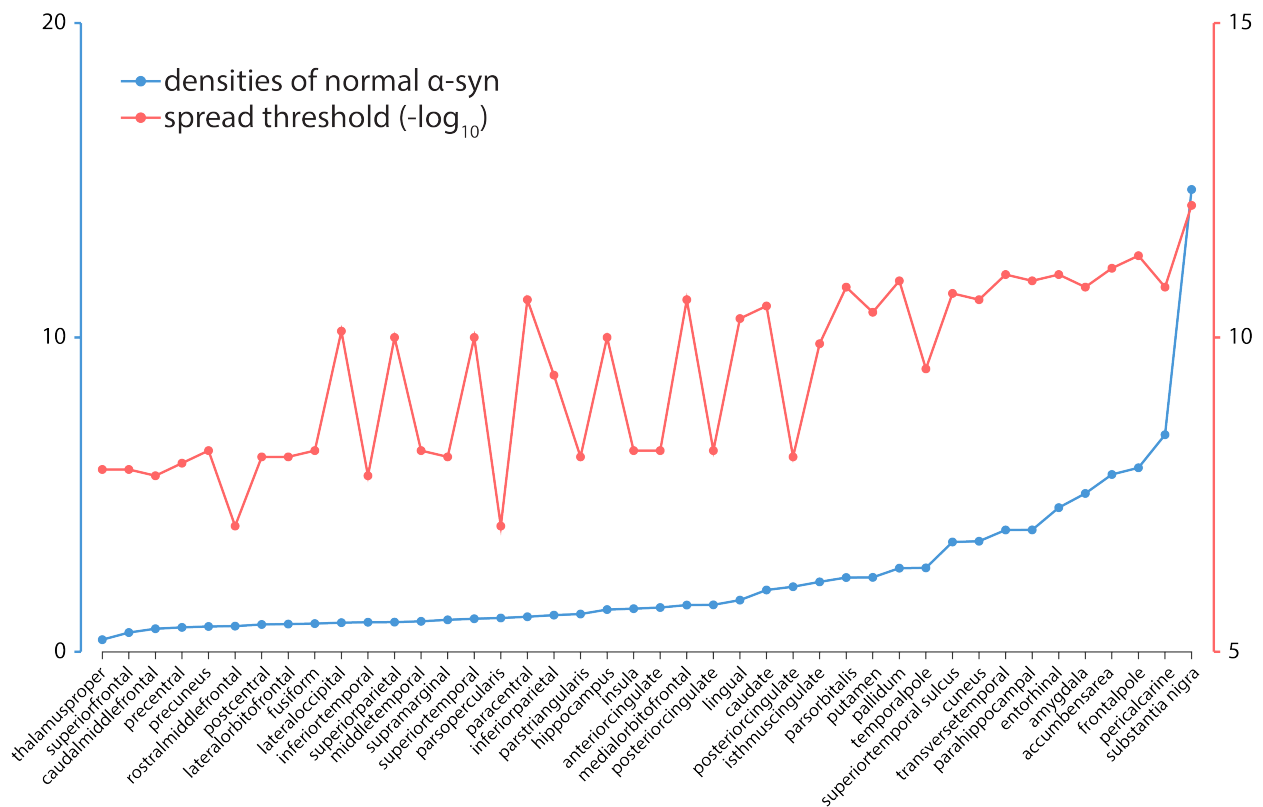

**Fig. 4. Identifying the disease epicenter** | Densities of normal  $\alpha$ -synuclein (blue) at equilibrium (represented by the stable point) and spread threshold (red). Spread threshold was inverted by  $-\log_{10}$ , so higher values indicate lower thresholds. Spread thresholds reflect the susceptibility of a region to trigger an epidemic. Basal ganglia regions are rich in endogenous  $\alpha$ -synuclein (caudate ranks among the top 42.9% regions; putamen, 31.0%; pallidum, 28.6%) and have relatively low spread threshold (caudate ranks among the lowest 35.7%; putamen, 38.1%; pallidum, 16.7%). Substantia nigra has the highest normal  $\alpha$ -synuclein level and lowest spread threshold, making it the most probable epicenter of disease outbreak.

247 An alternative definition of disease epicenter is the seed node most likely to initiate a disease  
248 outbreak. As explained in the previous section, the metapopulation model has two fixed points  
249 representing disease extinction or major outbreak. Although the choice of seed region and injection  
250 number of misfolded  $\alpha$ -synuclein agents does not affect the magnitude of misfolded  $\alpha$ -synuclein  
251 accumulation, it can initially shift the properties of the two fixed points, determining which one  
252 the system will converge to. We posited that the probability of triggering an outbreak indicates  
253 the plausibility of acting as an epicenter. Therefore, we quantified the spread threshold for each  
254 seed region, i.e., the minimally-required injection amount of misfolded  $\alpha$ -synuclein to initiate an  
255 outbreak. In traditional epidemic disease models that do not consider spatial structure or synthesis  
256 of new susceptible hosts, *basic reproduction number*  $R_0$  (the average number of susceptible agents  
257 that could be affected by an infectious agent before it has been removed) marks the transition  
258 between the regimes in which disease spreads or extinguishes (Newman 2010). However, in our  
259 metapopulation structured high-order system in which new agents are constantly synthesized and  
260 move across regions, the transition threshold can only be determined numerically.

261 Substantia nigra has the lowest spread threshold (FIG. 4, red line), suggesting that it is also the  
262 most plausible seed region to initiate an epidemic spread. This is consistent with the notion that  
263 substantia nigra acts as the epicenter for propagation to the supratentorial central nervous system  
264 (Zeighami et al. 2015), and is generally one of the earliest regions to display neuronal loss in PD.  
265 Interestingly, other basal ganglia regions also exhibited relatively low spread thresholds (caudate  
266 ranks among the lowest 35.7% of all the regions; putamen, 38.1%; pallidum, 16.7%). Note however  
267 that our model does not include regions caudal to the midbrain (see *Discussion*).

### 268 **Connectome architecture shapes disease spread**

269 We next asked whether model fit would be facilitated or degraded by disrupting the connectome's  
270 topology or spatial embedding (geometry). To address this question, we implemented two types of  
271 null models, in which (a) the topology of the connectome was randomized (rewired null); or (b) the  
272 spatial positions of the regions were shuffled (spatial null). Rewired null networks were generated  
273 by swapping pairs of edges while preserving the original degree sequence and density using the

274 Maslov-Sneppen algorithm (Maslov and Sneppen 2002) implemented in the Brain Connectivity  
275 Toolbox (<https://sites.google.com/site/bctnet/>) (Rubinov and Sporns 2010). Spatial null networks  
276 were generated by swapping the physical positions of the nodes while keeping their original  
277 connection profiles (Roberts et al. 2016; Seguin et al. 2018). This null model retains the degree  
278 sequence and connection profiles of every region, but randomizes spatial proximity. Networks at  
279 binary density 25%, 30%, 35% and 40% were selected as representatives to construct the two types  
280 of null networks, with 10,000 realizations each. We then implemented the dynamic model on each  
281 network and compared model fits for the empirical and null networks.

282 The metapopulation model simulated on top of the empirical structural network yielded sig-  
283 nificantly greater fit to empirical atrophy than models simulated on either type of null network.  
284 This result was consistent across network densities (rewired null, FIG. 5(a):  $p_{25\%} = 0.0014$ ,  
285  $p_{30\%} < 0.001$ ,  $p_{35\%} < 0.001$ ,  $p_{40\%} = 0.0018$ ; spatial null, FIG. 5(b):  $p_{25\%} < 0.001$ ,  $p_{30\%} < 0.001$ ,  
286  $p_{35\%} < 0.001$ ,  $p_{40\%} < 0.001$ ) and suggests that the high correspondence between simulated and  
empirical atrophy in PD is jointly driven by connectome topology and geometry.

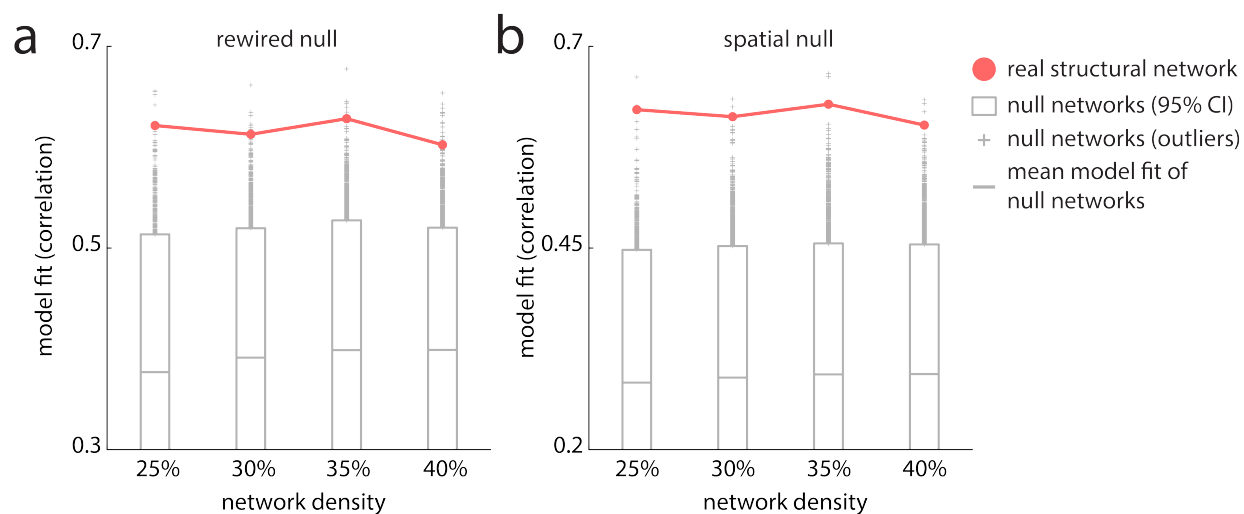

**Fig. 5. Effects of network topology and geometry** | Systematic disruption of (a) connectome topology (rewired null) or (b) spatial embedding (spatial null) significantly degrades model fit as measured by Spearman's correlation. Red = real structural network (empirical network); grey = null networks. Rewired null:  $p_{25\%} = 0.0014$ ,  $p_{30\%} < 0.001$ ,  $p_{35\%} < 0.001$ ,  $p_{40\%} = 0.0018$ ; spatial null:  $p_{25\%} < 0.001$ ,  $p_{30\%} < 0.001$ ,  $p_{35\%} < 0.001$ ,  $p_{40\%} < 0.001$ .

287

## 288 **Gene expression shapes disease spread**

289 We next sought to directly assess the influence of local gene expression on spreading patterns  
290 of neurodegeneration. Based on molecular evidence, the model uses regional expression of *GBA*  
291 and *SNCA* as determinants of  $\alpha$ -synuclein clearance and synthesis rate. Regional *GBA* and *SNCA*  
292 expressions were shuffled 10,000 times respectively by re-assigning the expression scores in each  
293 parcel (FIG. 6(a),(b) respectively). We then implemented the dynamic models with randomized  
294 expression levels and compared differences in model fit when using the empirical gene expression  
295 levels (FIG. 6, red) and permuted gene expression levels (FIG. 6, grey).

296 Shuffling the transcription profile of either gene significantly degrades model fit (FIG. 6(a), *GBA*:  
297  $p_{25\%} = 0.0031$ ,  $p_{30\%} < 0.001$ ,  $p_{35\%} < 0.001$ ,  $p_{40\%} = 0.0024$ ; FIG. 6(b), *SNCA*:  $p_{25\%} = 0.0102$ ,  
298  $p_{30\%} = 0.0201$ ,  $p_{35\%} = 0.0084$ ,  $p_{40\%} = 0.0334$ ) suggesting a significant role of *GBA* and *SNCA*  
299 expression in driving the spatial patterning of atrophy. In other words, the regional expression of  
300 the genes, as implemented in the dynamic model, serves to modulate the vulnerability of individual  
301 nodes above and beyond their topological attributes by influencing  $\alpha$ -synuclein synthesis, seeding  
302 and clearance.

303 An alternative explanation for these results is that simply introducing regional heterogeneity in  
304 gene expression levels improves model fit, for example because of differences in general transcrip-  
305 tion levels between cortex and subcortex. To address this possibility, we further assessed model fit  
306 in the cases where *GBA* and *SNCA* expression is made uniform across all brain regions. Instead of  
307 using empirical gene expression, we set uniform synthesis/clearance rates across all regions using  
308 the mean expression score, converted to a scalar value between [0, 1] using the standard normal  
309 cumulative distribution function. We then computed the model fit (peak Spearman's correlation  
310 value) for this "uniform" model. Critically, models using uniform transcription profiles under-  
311 performed compared to those using empirical transcription profiles (FIG. 6, red = empirical, blue  
312 = uniform); in other words, the incorporation of local differences in gene expression improves  
313 model fit, suggesting that the atrophy pattern in PD is not solely explained by pathogenic spreading  
314 *per se* but also depends on local vulnerability. Models implemented using uniform transcription

315 profiles of either gene exhibited above-chance model fit compared to shuffled transcription profiles  
 316 (*GBA* uniform correlations:  $r_{25\%} = 0.4479$ ,  $r_{30\%} = 0.3869$ ,  $r_{35\%} = 0.3672$ ,  $r_{40\%} = 0.3481$ ; *SNCA*  
 317 uniform correlations:  $r_{25\%} = 0.5653$ ,  $r_{30\%} = 0.5780$ ,  $r_{35\%} = 0.5767$ ,  $r_{40\%} = 0.5794$ , blue line in  
 318 FIG. 6). Altogether, these results demonstrate that regional expression of *GBA* and *SNCA* shapes  
 319 the spatial patterning of atrophy in addition to connectome topology and spatial embedding.

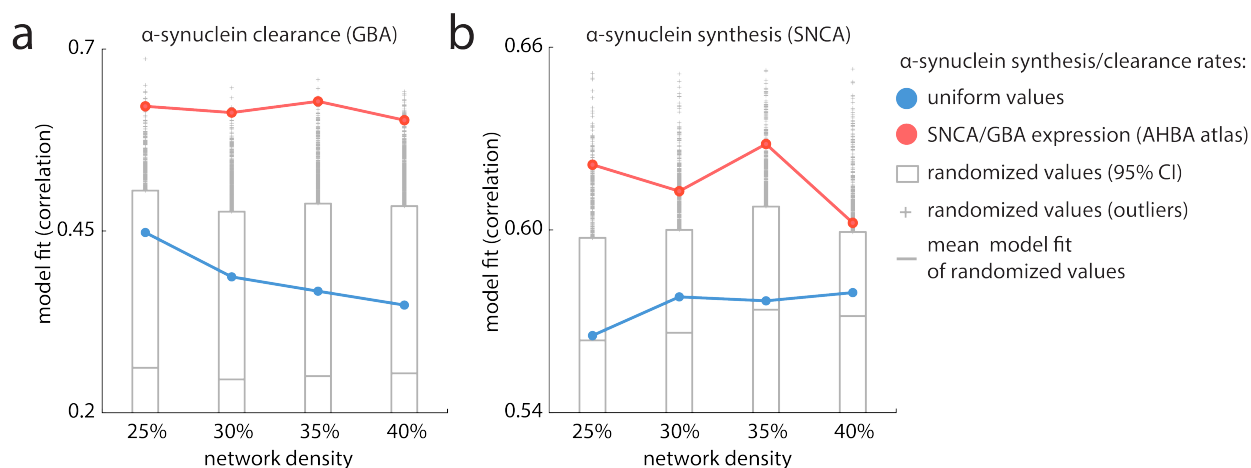

**Fig. 6. Assessing the contribution of *GBA* and *SNCA* gene expression** | To assess the influence of gene expression on atrophy, model fit using real expression values (red) is compared to null models in which node-wise expression profiles of *GBA* and *SNCA* (reflecting, respectively,  $\alpha$ -synuclein clearance and synthesis) were shuffled. Both manipulations significantly reduce model fit regardless of network density (*GBA*:  $p_{25\%} = 0.0031$ ,  $p_{30\%} < 0.001$ ,  $p_{35\%} < 0.001$ ,  $p_{40\%} = 0.0024$ ; *SNCA*:  $p_{25\%} = 0.0102$ ,  $p_{30\%} = 0.0201$ ,  $p_{35\%} = 0.0084$ ,  $p_{40\%} = 0.0334$ ). Notably, uniform transcription profiles, in which all nodes have identical expression values (blue) yield above-chance model fit, but perform poorly compared to the model with real expression values (*GBA* uniform correlations:  $r_{25\%} = 0.4479$ ,  $r_{30\%} = 0.3869$ ,  $r_{35\%} = 0.3672$ ,  $r_{40\%} = 0.3481$ ; *SNCA* uniform correlations:  $r_{25\%} = 0.5653$ ,  $r_{30\%} = 0.5780$ ,  $r_{35\%} = 0.5767$ ,  $r_{40\%} = 0.5794$ ).

## 320 Structural and functional connectivity interact to drive disease spread

321 Finally, we tested whether neuronal activity or pre- and post-synaptic co-activation may facilitate  
 322  $\alpha$ -synuclein propagation. Past neuroimaging studies have shown that cortical thinning in PD is  
 323 predicted in part by functional connectivity to affected subcortical regions, and that regions that  
 324 exhibit stronger functional connectivity with the substantia nigra tend to exhibit greater atrophy  
 325 (Zeighami et al. 2015; Yau et al. 2018). Secretion of  $\alpha$ -synuclein by neurons has been shown to  
 326 be activity dependent (Paillusson et al. 2013). Spread of  $\alpha$ -synuclein through multiple anatomical



327 pathways may be biased by synchronous activity between the pre- and post-synaptic cells, such that  
328 the agents are more likely to move towards regions with higher functional connectivity to a seed  
329 region.

330 To address this question, we integrated resting-state fMRI functional connectivity into the model.  
331 We introduce a term  $e^{k \times fc_{(i,j)}}$  to rescale the probability of moving from region  $i$  to region  $j$  previously  
332 defined by the connection strength of edge  $(i, j)$  while keeping the sum of the probabilities equal to 1  
333 to preserve the multinomial distribution (see *Methods*). As  $k$  is increased, the influence of functional  
334 connectivity is greater: stronger co-activation patterns play a more influential role in modulating  
335 the motion of the agents on structural connections. For structural edges with relatively small  
336 corresponding functional connectivity values, larger  $k$  may decrease those edges' contributions to  
337 favour propagation through edges with greater functional connectivity. All negative-valued and  
338 non-significant functional connections were set to zero.

339 We varied  $k$  from 0 (no influence of functional connectivity) to 5 and derived the corresponding  
340 peak values of model fit using the same four structural connectome densities as before (FIG. 7).  
341 Model fit was improved by progressively increasing the importance of functional connectivity, but  
342 only up to a point ( $k_{25\%} = 1$ ,  $k_{30\%} = 2.5$ ,  $k_{35\%} = 2.5$ ,  $k_{40\%} = 2.5$ ). Beyond this point, the influence  
343 of functional connectivity dominates the agents' mobility pattern resulting in diminished model  
344 fit. The results were consistent across network densities. These results provide evidence for the  
345 notion that while  $\alpha$ -synuclein propagation and resultant brain atrophy patterns occur via anatomical  
346 connections, they may also be biased by neuronal activity.

347 An alternative explanation is that inclusion of functional connectivity simply leads to over-  
348 fitting the model. To test this possibility, we investigated if the same improvement in model fit  
349 could be observed if  $\alpha$ -synuclein spread is biased by randomized functional connectivity patterns.  
350 We generated "null" functional connectivity matrices by randomly re-assigning the parcellated  
351 rs-fMRI time series into the 42 left hemisphere regions. The results are shown in FIG. S6. We note  
352 two important results. First, atrophy patterns based on real functional connectivity consistently  
353 yield significantly higher model fit than atrophy patterns based on null functional connectivity.

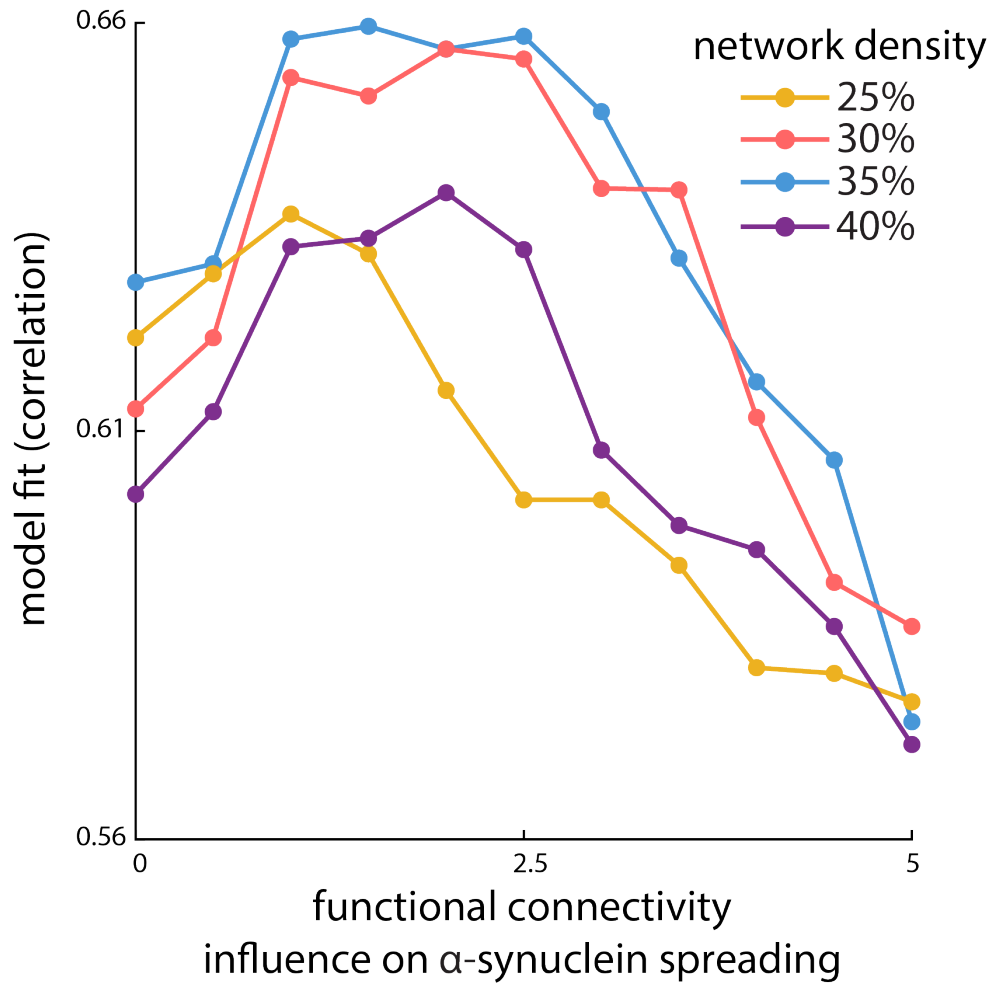

**Fig. 7. Incorporating functional connectivity improves model fit** | Resting-state fMRI functional connectivity was incorporated in the model by tuning the probability of  $\alpha$ -synuclein propagation along structural connections. As the influence of functional connectivity is increased,  $\alpha$ -synuclein spreading is biased towards structural connections that exhibit high functional connectivity. Model fit is shown for a range of structural connection densities. A balanced effect of functional connectivity and structural connectivity improves model performance, while excessive influence of functional connectivity degrades model fit. The same beneficial effect is not observed when randomized, “null” functional connectivity patterns are used (FIG. S6).

354 Second, model fits based on null functional connectivity do not have the same peaked shape as  
355 observed when using real functional connectivity. This further support the conclusion that atrophy  
356 patterns observed in PD patients depend on both the structural and functional architecture of the  
357 brain.

## 358 DISCUSSION

359 We developed a metapopulation structured model of neurodegenerative disease consisting of  
360 normal and misfolded proteins. Taking PD as an example, we integrated multimodal neuroimaging  
361 and gene expression data to simulate the propagation of misfolded  $\alpha$ -synuclein on the healthy  
362 connectome. The metapopulation S-I-R model incorporates pathogenic spread (dominated by  
363 the connectome) and selective vulnerability (modulated here by gene expression) under the same  
364 computational framework. The dynamic model replicated the spatial pattern of measured brain  
365 atrophy in PD patients and had greater predictive power than any of the constituent features (i.e.  
366 network metrics or gene expression) on their own. Our results demonstrate that connectome  
367 topology and geometry, local gene expression, and functional co-activation jointly shape disease  
368 progression, as systematic disruption of each of these elements significantly degraded model  
369 performance. This model yields insights into the mechanism of PD, providing support for the  
370 propagating proteinopathy theory, and can be readily adapted to other neurodegenerative diseases.

371 Network-based epidemic models can be classified into two main categories: (1) compartmental  
372 models, in which nodes of the graph adopt different states (e.g. concentration of disease), and  
373 the infection propagates via diffusion; and (2) agent-based models, in which agents (in this case,  
374 proteins) adopt different states (S-I-R) and interact with each other according to simple rules  
375 (Newman 2010). The metapopulation S-I-R model used here is a hybrid, using a compartmental  
376 model within (brain) subregions, but allowing agents to travel along the connectome (Balcan et al.  
377 2010). This allows it to map the interaction between network architecture and regional susceptibility  
378 and transmissibility. Solving our metapopulation S-I-R model numerically yielded two fixed (or  
379 stable) points of the process after seeding of the infection: rapid extinction or epidemic spread. If  
380 the system is attracted to extinction, misfolded proteins will eventually be removed from the system.  
381 If the system is attracted to the fixed point that represents an outbreak, misfolded proteins will still  
382 not accumulate boundlessly, but will finally achieve a stable concentration and co-exist with normal  
383 proteins. These results are consistent with recent experimental evidence in rodents where injection  
384 of misfolded  $\alpha$ -synuclein fibrils either died out at specific injection sites (extinction), or grew but

385 ceased to propagate at a certain stage (Rey et al. 2018), suggesting the existence of an equilibrium.  
386 These different outcomes (extinction vs outbreak) might perhaps represent normal aging versus  
387 progressive neurodegeneration, or mild versus malignant PD (Fereshtehnejad et al. 2017).

388 *A priori* there are several topological properties of brain networks that favour disease spread.  
389 Brains are canonical examples of small-world networks (Watts and Strogatz 1998), where path  
390 lengths between any two nodes are relatively short, a feature that facilitates disease outbreaks  
391 (Moore and Newman 2000). Brain networks display prominent community structure: the tendency  
392 to cluster into highly interconnected communities or modules (Hilgetag and Kaiser 2004; Sporns  
393 and Betzel 2016). Perhaps counter-intuitively, community structure may also potentiate global  
394 disease spread by enhancing local, intra-community infection (Nematzadeh et al. 2014). Finally,  
395 the presence of high degree nodes (hubs) that are highly interconnected with each other (van den  
396 Heuvel et al. 2012) favours disease propagation. Hubs and are expected to have faster arrival  
397 times, and greater accumulation of infected agents, making them especially vulnerable to attack.  
398 Indeed, hubs manifest greater structural abnormalities in a host of neurodegenerative diseases  
399 (Crossley et al. 2014). We showed that disruptions of the network's architecture reduce model fit,  
400 providing evidence that the emergent dynamics of synucleinopathy depend on network connectivity  
401 (topology) and geometry (spatial embedding).

402 While we did find that network metrics predict brain atrophy, the full dynamic agent-based  
403 model provided a better fit to the empirical data (FIG. 3). Spatial proximity among regions  
404 and local differences in synthesis/clearance (see below) both impose constraints on the spreading  
405 process, amplifying or damping the rate of infection. As a result, atrophy patterns are shaped by,  
406 but ultimately transcend, the underlying connection patterns. The present model correctly predicts  
407 that the regions most vulnerable to atrophy are not simply those that participate in the greatest  
408 number of connections or those that are a few steps away from other infected regions. A similar  
409 phenomenon was recently described in schizophrenia: vulnerability of prefrontal "hub" regions to  
410 grey matter atrophy may be a function of both connectivity and spatial location (Gollo et al. 2018).

411 More generally, the metapopulation model also allowed us to test two competing theories of

412 PD pathogenesis: protein propagation versus regional vulnerability (Brundin and Melki 2017;  
413 Surmeier et al. 2017). Protein propagation, or the “pathogenic spread” hypothesis, is suggested to  
414 be primarily driven by non-cell-autonomous factors such as network connectivity. Our model inte-  
415 grates gene expression into a node’s properties, enabling us to operationalize additional molecular  
416 cell-autonomous factors on hubs, which cannot be solely explained by network structure. Thus the  
417 dynamics arise from an interplay between regional vulnerability and network-wide propagation.

418 Regional vulnerability may also depend on local cell-autonomous factors such as gene expres-  
419 sion (Jackson 2014). Here we chose to model regional vulnerability by incorporating estimated  
420 local  $\alpha$ -synuclein concentration, known to facilitate seeding (Volpicelli-Daley et al. 2011) and  
421 increase neuronal vulnerability in animal models (Luna et al. 2018). We used regional expression  
422 of *GBA* and *SNCA* as estimates of  $\alpha$ -synuclein clearance and synthesis rates to derive the concen-  
423 tration of endogenous  $\alpha$ -synuclein. We showed that incorporating this information into the model  
424 improved the correlation with empirical atrophy in PD patients; moreover, spatial permutation of  
425 gene expression degraded the fit. Thus, our findings support a key role for both propagation and  
426 local vulnerability in shaping PD progression.

427 Our results provide converging evidence for the involvement of *GBA* and *SNCA* in PD pathology  
428 previously indicated in animal and cellular studies (Alcalay et al. 2015). Mutations in *GBA* are  
429 the most common genetic risk factor for PD (Aharon-Peretz et al. 2004; Sidransky and Lopez  
430 2012); mutations and multiplications of *SNCA* have been implicated in driving the severity of the  
431 pathology (Singleton et al. 2003; Chartier-Harlin et al. 2004; Ibanez et al. 2004). It is worth noting  
432 that simple spatial correlation measures alone failed to uncover the effects of *GBA* or *SNCA* regional  
433 expression on the empirical atrophy pattern; the gene expression effects only emerged from the  
434 full agent-based propagating model, which therefore provides a new way to identify gene-disease  
435 associations in the central nervous system. New genes can easily be incorporated to adapt the  
436 model to other neurodegenerative diseases.

437 The benefit of augmenting network structure with protein spreading dynamics is exemplified  
438 by the identification of the substantia nigra as the likeliest disease epicenter. Mirroring the *Repro-*

439 *duction number*  $R_0$  (Newman 2010), which marks the transition between disease extinction and  
440 outbreak in conventional epidemic models, we estimated spread threshold for our metapopulation  
441 S-I-R model. This represents the minimum number of infectious agents that need to be introduced  
442 in any area that will lead to a major outbreak. In our model, the substantia nigra has the lowest  
443 spread threshold, identifying it as a likely disease epicenter. This is consistent with the Braak  
444 hypothesis, where the substantia nigra is one of the earliest affected sites in the central nervous  
445 system. Note that we could not include structures in the pons and medulla, thought to be affected  
446 even earlier in PD (Braak et al. 2003; Braak et al. 2004), due to difficulty in imaging either brain  
447 atrophy or white matter tracts in the brainstem.

448 It is also known that  $\alpha$ -synuclein is secreted in an activity dependent manner (Paillusson et al.  
449 2013). We therefore tested the influence of rs-fMRI derived measures of functional connectivity on  
450 protein mobility. As a measure of synchronous neuronal activity in pre- and post-synaptic regions,  
451 functional connectivity will bias the proteins into regions showing greater co-activation. Once again  
452 we found that this addition significantly improved the model fit. Thus, functional co-activation also  
453 shapes the pattern of disease propagation, explaining why atrophy patterns in neurodegenerative  
454 diseases tend to resemble intrinsic functional networks (Seeley et al. 2009; Zeighami et al. 2015).

455 We took advantage of several useful features of metapopulation models to provide an un-  
456 derstanding of factors involved in disease propagation. Others have applied more traditional  
457 compartmental models to Alzheimer's Disease (Raj et al. 2012; Iturria-Medina et al. 2014) and to  
458 neurodegeneration more generally (Weickenmeier et al. 2018); however the agent-based model used  
459 here affords us the possibility of testing different mechanisms of disease, likelihood of outbreak,  
460 effect of emergent properties (such as the effect of regional neuronal death on subsequent disease  
461 propagation) and, eventually, therapeutic interventions. Notably, metapopulation models share the  
462 assumption with agent-based models that the individuals act independently according to specific  
463 rules. The metapopulation models are generalized agent-based models and are more tractable and  
464 computationally efficient. They can be easily tailored to accommodate an agent-based setting by  
465 introducing more fine-grained rules. For example, the transmission rate  $\gamma_i = 1 - e^{M \ln(1-\gamma_i^0)}$  can be

466 extrapolated as  $\gamma_i = 1 - e^{\sum_{k=1}^M \ln(1-\gamma_{i,k}^0)}$  to model individually differentiated transmission rates  $\gamma_{i,k}^0$  in  
467 region  $i$ .

468 Because the metapopulation or agent-based S-I-R models have proven useful in understanding  
469 chain reaction-like infection transmission, we supposed that they would be a good candidate for  
470 modelling prion-like mechanisms of neurodegeneration. These models may also be applied to other  
471 neurodegenerative diseases, and perhaps eventually to developmental or non-progressive diseases  
472 where transneuronal transmissibility may be implicated (e.g. autism, schizophrenia, epilepsy).

473 Although the S-I-R metapopulation structured model provided a good fit to observed neurode-  
474 generation, there are several caveats and limitations in the present study. First, regional variations  
475 in vulnerability to the toxicity of misfolded  $\alpha$ -synuclein apart from the effects of  $\alpha$ -synuclein con-  
476 centration were not accounted for. Moreover, neuronal loss is homogeneously modelled as a simple  
477 linear combination of cell death due to native  $\alpha$ -synuclein accumulation and deafferentation, which  
478 may not reflect reality. It is possible that regions respond differently to the toxicity of  $\alpha$ -synuclein  
479 aggregates, and this can easily be incorporated into the model by introducing new factors, such  
480 as genes that control resilience to energetic stress for example (Michel et al. 2016). Moreover,  
481 cell death may slow the propagation of misfolded  $\alpha$ -synuclein and accrual of atrophy, especially  
482 in more affected regions. Although we did not take this effect into account here, it can easily be  
483 incorporated into the model using agent-based rules.

484 Second, the white matter network may not represent the exact physical routes of spread. It is  
485 possible that  $\alpha$ -synuclein spread occurs only between specific cell types, or in one direction, while,  
486 in our model, the agents spread bi-directionally along the fiber tracts. The outlier region (accumbens,  
487 FIG. 2(b)) that remarkably impedes model fit serves as an example. Nucleus accumbens is one of  
488 the least atrophied regions in the dataset used here, whereas it exhibits high atrophy in the model.  
489 One possible reason for this disagreement is that we did not include the different subsections of  
490 the substantia nigra and their projections in the structural connectome used for the model. While  
491 we seeded the entire substantia nigra, it is known that the medial portion, which projects to the  
492 accumbens (Zhang et al. 2017), is less affected in PD than the lateral substantia nigra, which

493 projects to dorsal striatum (Braak et al. 2003; Braak et al. 2004).

494 Finally, we focused on only two genes in modelling synucleinopathy, while many other genes  
495 such as *LRKK2* and *MAPT*, and proteins such as dopamine or *tau*, may also influence or interact  
496 with synucleinopathy propagation. Using a small subset of genes avoids high model complexity  
497 and allowed modelling the proteinopathy in a parameter-free setting. However, the parameter-free  
498 setting introduces another caveat: the model converts gene expression scores and fiber density into  
499 probabilities without scaling their relative magnitude, while the actual rate of synthesis/clearance  
500 and protein spreading may not be at the same scale. In the future this can be solved by introducing  
501 scaling parameters into the model, training the model on individual connectome and genetic data  
502 to find the optimal solutions, and including multiple timepoints from patient data.

503 One of the future directions is to customize the model with individual anatomical, functional,  
504 genetic or clinical data to increase its ability to predict disease trajectory and to identify factors  
505 that promote resistance to disease spread. Moreover, this model can hopefully help test new  
506 preventative procedures. Introducing medications may change the parameters of the dynamical  
507 system; for example, increasing *GBA* activity to elevate the clearance rate would make the stable  
508 point for extinction more robust to small perturbations (e.g., the invasion of misfolded  $\alpha$ -synuclein  
509 fibrils).

## 510 **METHODS**

### 511 **Human brain parcellation**

512 We used a brain parcellation generated by atlas-based segmentation (Cammoun et al. 2012).  
513 68 cortical parcels were defined using curvature-based information (Desikan et al. 2006), which is  
514 available in FreeSurfer (<http://surfer.nmr.mgh.harvard.edu>). Subcortical parcels, including thalamus,  
515 caudate, putamen, pallidum, accumbens, amygdala, and hippocampus, were extracted using  
516 the same software from a whole brain segmentation (Fischl et al. 2002). Finally, substantia nigra was  
517 added to the atlas using the location provided in the ATAG atlas (<https://www.nitrc.org/projects/atag>)  
518 (Keuken et al. 2014). Only the left hemisphere was used in this model, resulting in a total of 42  
519 regions for the subsequent analysis. We used only the left hemisphere to simulate the propagation



520 model because it is difficult to accurately determine interhemispheric connections using tractogra-  
521 phy (Jbabdi and Johansen-Berg 2011). Moreover, regional gene expression was mostly available  
522 only for the left hemisphere (see *Regional gene expression*).

### 523 **PPMI patient data and image processing**

524 PPMI is an open-access comprehensive observational clinical study (Marek et al. 2011), lon-  
525 gitudinally collecting multimodal imaging data, biological samples and clinical and behavioural  
526 assessments in a cohort of PD patients. 3T high-resolution T1-weighted MRI scans of 355 subjects  
527 (237 PD patients, 118 age-matched healthy controls) were obtained from the initial visit of PPMI  
528 to assess group-level regional atrophy using Deformation-Based Morphometry (DBM) (Zeighami  
529 et al. 2015), a method to detect local changes in tissue density.

After denoising (Coupé et al. 2008), inhomogeneity correction (Sled et al. 1998), and lin-  
ear intensity scaling, individual MRI images are registered non-linearly to the MNI152-2009c  
template (Collins and Evans 1997), yielding the corresponding transformation fields to be in-  
verted into deformation maps in MNI space. Instead of directly using the displacement value  
 $U(x) = (u_1(x), u_2(x), u_3(x))$  of voxel  $x$  at coordinates  $(x_1, x_2, x_3)$ , we calculate the derivative of the  
displacement in each direction and take the determinant of the jacobian matrix  $J$  minus 1, namely,  
 $|J| - 1$ , as the value of deformation at  $x$ , which reflects local volume change.

$$J = \frac{\partial U}{\partial x} = \begin{pmatrix} \frac{\partial u_1}{\partial x_1} & \frac{\partial u_1}{\partial x_2} & \frac{\partial u_1}{\partial x_3} \\ \frac{\partial u_2}{\partial x_1} & \frac{\partial u_2}{\partial x_2} & \frac{\partial u_2}{\partial x_3} \\ \frac{\partial u_3}{\partial x_1} & \frac{\partial u_3}{\partial x_2} & \frac{\partial u_3}{\partial x_3} \end{pmatrix} \quad (1)$$

530 These values constitute a 3D deformation map for each subject, on which an un-paired t test is  
531 conducted to derive the statistical difference (t-score) between the PD patients and the healthy  
532 controls at each voxel as a measure of local atrophy.

### 533 **Regional gene expression**

534 Regional gene expression levels were derived from the six post-mortem brains included in the  
535 Allen Human Brain Atlas (AHBA) (Hawrylycz et al. 2012), a multimodal atlas of the anatomy and

536 microarray-based gene expression of the human brain. Individuals who donated their brains had  
537 no history of psychiatric or neurological disorders. Since four of the brains have data from the left  
538 hemisphere only, we only modeled the left hemisphere in our study, selecting a total of 3021 samples  
539 of *GBA* (probe ID: 1025373, 1025374), *SNCA* (probe ID: 1020182, 1010655) in left hemisphere  
540 regions. Cortical samples were volumetrically mapped to the 34 cortical regions of our parcellation  
541 according to their corrected MNI coordinates (<https://github.com/chrisfilo/alleninf>) (Gorgolewski  
542 et al. 2014), also including samples that are within 1mm of the nearest gray matter coordinates  
543 assigned to any region. Subcortical samples were assigned to one of the 8 subcortical regions as  
544 specified by the structure names provided in the AHBA, due to imperfect registration of the post-  
545 mortem brains onto MNI space. For each probe, all samples that fell in the same anatomical region  
546 were averaged and then normalized across all 42 left hemisphere regions, generating transcription  
547 maps of each individual probe. These probe maps were next averaged according to the gene  
548 classification and normalized again across the regions, yielding the spatial expression profiles for  
549 *SNCA* and *GBA* respectively, represented as  $42 \times 1$  vectors (FIG. S7).

### 550 **Diffusion weighted image processing and structural connectivity**

551 A total of 1027 subjects' preprocessed diffusion MRI data with the corresponding T1 images  
552 was obtained from the Human Connectome Project (2017 Q4, 1200-subject release) to construct  
553 an average macroscopic structural connectivity map of the healthy brain. With a multishell scheme  
554 of b values 1000, 2000, 3000  $s/mm^2$  and the number of diffusion sampling directions 90, 90,  
555 90, the diffusion data were reconstructed in individual T1 spaces using generalized q-sampling  
556 imaging (GQI) (Yeh et al. 2010) with a diffusion sampling length ratio of 1.0, outputting at each  
557 voxel quantitative anisotropy (QA) and the Spin distribution function (SDF), a measurement of the  
558 density of diffusing water at different orientations (Yeh and Tseng 2011).

559 Deterministic fiber tracking was conducted in native space using DSI studio ([www.dsi-studio.lab](http://www.dsi-studio.lab)  
560 solver.org) (Yeh et al. 2013). The 42 left hemisphere regions in standard space were mapped non-  
561 linearly onto the individual T1 images using the FNIRT algorithm (<https://fsl.fmrib.ox.ac.uk/>)  
562 (Jenkinson et al. 2012) with a warp resolution of 8mm, 8mm, 8mm. The 34 cortical regions

563 were dilated toward the grey-white matter interface by 1mm. The QA threshold was set to  
564  $0.6 \times$  Otsu's threshold, which maximizes the variance between background and foreground pixels.  
565 To compensate for volume-size introduced biases, deterministic tractography was performed for  
566 each region (taken as the seed region) separately. With an angular cutoff of 55, step size of  
567 0.5mm, minimum length of 20mm, and maximum length of 400mm, 100,000 streamlines were  
568 reconstructed for each seed region. Connection strength between the seed region and the target  
569 region was set to be the density of streamlines (streamline counts) normalized by the volume  
570 size (voxel counts) of the target region and the mean length of the streamlines. The goal of this  
571 normalization is to correct for the bias toward large regions and long fibers inherent in the fiber  
572 tracking algorithms. The procedure was repeated for each region (as the tractography seed region),  
573 resulting in 42 connection profiles (42  $1 \times 42$  vectors). Each connection profile consists of the  
574 connection strengths between the seed region and all other brain regions with self-connection  
575 setting to zero. These connection profiles were finally concatenated to generate a  $42 \times 42$  structural  
576 connectivity matrix per subject. Varying numbers of most commonly occurring edges were selected  
577 and averaged across the individual structural connectivity matrices to construct the group structural  
578 connectivity matrix with binary density ranging from 25% to 45%. These group-level matrices  
579 were finally symmetrized to represent (un-directed) brain networks. Likewise, we also constructed a  
580 group-level length matrix in which elements denote mean lengths of the corresponding streamlines,  
581 which were used to model the mobility pattern of agents in the edges.

## 582 **S-I-R metapopulation structured model**

583 The S-I-R metapopulation structured model includes five modules:

- 584 • (a) production of normal  $\alpha$ -synuclein
- 585 • (b) clearance of normal and misfolded  $\alpha$ -synuclein
- 586 • (c) misfolding of normal  $\alpha$ -synuclein (infection transmission)
- 587 • (d) propagation of normal and misfolded  $\alpha$ -synuclein
- 588 • (e) accrual of neuronal death (atrophy).

589 It assumes that  $\alpha$ -synuclein molecules are independent agents with mobility patterns and lifespans  
590 characterized by the connectome's architecture, neuronal activity, and regional gene expression.  
591 The normal  $\alpha$ -synuclein agents, synthesized continuously under the modulation of regional *SNCA*  
592 expressions, are susceptible to the misfolding process when they come in contact with a misfolded  
593 agent. Once infected, they adopt the misfolded form and join the infectious population. Both  
594 normal and infected agents may spread via fiber tracts towards connected regions. The degradation  
595 rate of both agents is modulated by *GBA* expression, which codes for the lysosomal enzyme  
596 glucocerebrosidase (Sidransky and Lopez 2012).

597 **Production of normal  $\alpha$ -synuclein.** In each voxel of region  $i$ , a new normal agent may  
598 get synthesized per unit time with probability  $\alpha_i$ , i.e., the synthesis rate in region  $i$ .  $\alpha_i$  is chosen  
599 as  $\Phi_{0,1}(SNCA_{expression_i})$  where  $\Phi_{0,1}(\cdot)$  is the standard normal cumulative distribution function,  
600 hence a higher expression score entails a higher  $\alpha$ -synuclein synthesis rate. The increment of  
601 normal agents in region  $i$  is  $\alpha_i S_i \Delta t$  after a total time  $\Delta t$ , where  $S_i$  is the size (voxel count) of region  
602  $i$ .  $\Delta t$  was set to 0.01.

603 **Clearance of normal and misfolded  $\alpha$ -synuclein.** Agents in region  $i$ , either normal or  
604 misfolded, may get cleared per unit time with probability  $\beta_i$ , the clearance rate in region  $i$ . Likewise,  
605  $\beta_i$  is set to  $\Phi_{0,1}(GBA_{expression_i})$ . Considering that the probability that an agent is still active after  
606 a total time  $\Delta t$  is given by  $\lim_{\delta\tau \rightarrow 0} (1 - \beta\delta\tau)^{\Delta t/\delta\tau} = e^{-\beta\Delta t}$ , the cleared proportion within time step  
607  $\Delta t$  is  $1 - e^{-\beta\Delta t}$ .

608 **Misfolding of normal  $\alpha$ -synuclein (infection transmission).** The normal agents that survive  
609 clearance may become infected with probability  $\gamma_i = 1 - e^{M_i \ln(1-\gamma_i^0)}$  in region  $i$ , where  $M_i$  is  
610 the population of misfolded agents and  $\gamma_i^0$  is the baseline transmission rate which measures the  
611 likelihood that a single misfolded agent can transmit the infection to other susceptible agents.  $\gamma_i$   
612 denotes the probability of getting infected by at least one of the  $M_i$  misfolded agents in region  $i$  per  
613 unit time. The baseline transmission rate  $\gamma_i^0$  in region  $i$  is set to the reciprocal of region size,  $1/S_i$ .  
614 Analogous to the clearance module, the probability that a normal agent is uninfected after a total  
615 time  $\Delta t$  is given by  $\lim_{\delta\tau \rightarrow 0} (1 - \gamma_i^0 \delta\tau)^{M_i \Delta t/\delta\tau} = e^{-\gamma_i^0 M_i \Delta t}$ , thus the proportion of normal agents that

616 undergo misfolding within  $\Delta t$  is  $1 - e^{-\gamma_i^0 M_i \Delta t}$ .

Therefore, in determining the baseline regional density of normal  $\alpha$ -synuclein, we increment the population of normal agents  $N_i$  with:

$$\Delta N_i = \alpha_i S_i \Delta t - (1 - e^{-\beta_i \Delta t}) N_i \quad (2)$$

After the system reaches the stable point (error tolerance  $\epsilon < 10^{-7}$ ), we initiate the pathogenic spread and update the population of normal ( $N$ ) and misfolded ( $M$ ) agents with:

$$\Delta N_i = \alpha_i S_i \Delta t - (1 - e^{-\beta_i \Delta t}) N_i - (e^{-\beta_i \Delta t})(1 - e^{-\gamma_i^0 M_i \Delta t}) N_i \quad (3)$$

$$\Delta M_i = (e^{-\beta_i \Delta t})(1 - e^{-\gamma_i^0 M_i \Delta t}) N_i - (1 - e^{-\beta_i \Delta t}) M_i \quad (4)$$

617 The system has two fixed points, whose final positions will not be affected by the initial conditions  
 618 of  $(N_i, M_i)$ , including the choice of seed region and seeded misfolded agents (see *Supplementary*  
 619 *Information*). Note that normal and misfolded agents are equivalent to susceptible and infected  
 620 agents.

**Propagation of normal and misfolded  $\alpha$ -synuclein.** Agents in region  $i$  may remain in region  $i$  or enter the edges according to a multinomial distribution per unit time with probabilities:

$$P_{\text{region } i \rightarrow \text{region } i} = \rho_i \quad (5)$$

$$P_{\text{region } i \rightarrow \text{edge } (i,j)} = (1 - \rho_i) \frac{w_{ij}}{\sum_j w_{ij}} \quad (6)$$

where  $w_{ij}$  is the connection strength of edge  $(i, j)$  (fiber tracts density between region  $i$  and  $j$ ). The probability of remaining in the current region  $i$ ,  $\rho_i$ , was set to 0.5 for all  $i$  (see FIG. S8(a) for other choices of  $\rho_i$ ; we note that the model fit is robust to variations in  $\rho_i$ ). Analogously, the agents in

edge  $(i, j)$  may exit the edge or remain in the same edge per unit time with binary probabilities:

$$P_{\text{edge } (i,j) \rightarrow \text{region } j} = \frac{1}{l_{ij}} \quad (7)$$

$$P_{\text{edge } (i,j) \rightarrow \text{edge } (i,j)} = 1 - \frac{1}{l_{ij}} \quad (8)$$

where  $l_{ij}$  is the length of edge  $(i, j)$  (the mean length of the fiber tracts between region  $i$  and region  $j$ ). We use  $N_{(i,j)}$ ,  $M_{(i,j)}$  to denote the normal/misfolded population in edge  $(i, j)$ . After a total time  $\Delta t$ , the increments of  $N_i$ ,  $M_i$  in region  $i$  are:

$$\Delta N_i = \sum_j \frac{1}{l_{ji}} N_{(j,i)} \Delta t - (1 - \rho_i) N_i \Delta t \quad (9)$$

$$\Delta M_i = \sum_j \frac{1}{l_{ji}} M_{(j,i)} \Delta t - (1 - \rho_i) M_i \Delta t \quad (10)$$

Likewise,

$$\Delta N_{(i,j)} = (1 - \rho_i) \frac{w_{ij}}{\sum_j w_{ij}} N_i \Delta t - \frac{1}{l_{ij}} N_{(i,j)} \Delta t \quad (11)$$

$$\Delta M_{(i,j)} = (1 - \rho_i) \frac{w_{ij}}{\sum_j w_{ij}} M_i \Delta t - \frac{1}{l_{ij}} M_{(i,j)} \Delta t \quad (12)$$

621 We adopt an asynchronous implementation in which the propagation of normal and misfolded agents  
 622 is operated before the synthesis, clearance and infection at each  $\Delta t$ . We have also tried other imple-  
 623 mentations, including propagation after synthesis/clearance/infection at each  $\Delta t$  and synchronous  
 624 implementation, and found the differences are negligible, suggesting that our results are independent  
 625 of the modules' update order. The simulator is available at [https://github.com/yingqiuz/SIR\\_simulator](https://github.com/yingqiuz/SIR_simulator).

**Accrual of neuronal death (atrophy).** We model neuronal death as the result of two processes: direct toxicity from accumulation of native misfolded  $\alpha$ -synuclein and deafferentation (reduction in neuronal inputs) from neuronal death in neighbouring (connected) regions. The atrophy accrual

at  $t$  within  $\Delta t$  in region  $i$  is given by the sum of the two processes:

$$\Delta L_i(t) = k_1(1 - e^{-r_i(t)\Delta t}) + k_2 \sum_j \frac{w_{ji}}{\sum_j w_{ji}} (1 - e^{-r_j(t-1)\Delta t}) \quad (13)$$

626 where  $r_i(t)$  is the proportion of misfolded agents in region  $i$  at time  $t$ , and  $1 - e^{-r_i(t)\Delta t}$  quantifies the  
627 increment of atrophy caused by accumulation of native misfolded  $\alpha$ -synuclein aggregates within  $\Delta t$   
628 at time  $t$ . The second term  $1 - e^{-r_j(t-1)\Delta t}$ , weighted by  $w_{ji}/\sum_j w_{ji}$  and summed up across  $j$ , accounts  
629 for the increment of atrophy induced by deafferentation from its neighbouring regions within  $\Delta t$   
630 at  $t - 1$ .  $k_1, k_2$  are the weights of the two terms with  $k_1 + k_2 = 1$ . We set  $k_1 = k_2 = 0.5$  such  
631 that native  $\alpha$ -synuclein accumulation and the deafferentation have equal importance in modelling  
632 the total atrophy growth (see FIG. S8(b) for other choices of  $k_1, k_2$ ; we note that the model fit is  
633 consistent across  $k_1/k_2$  ranging from 0.1 to 10).

### 634 **Integration of functional connectivity**

635 We used resting-state functional MRI (rs-fMRI) scans from the Human Connectome Project  
636 (2015, S500 release) to construct the functional connectivity maps. Both left-right (LR) and right-  
637 left (RL) phase encoding direction data were used. Based on the minimally preprocessed rs-fMRI  
638 data, further processing steps were performed, including: 1) nuisance signal regression (including  
639 white matter, cerebrospinal fluid, global signal, and six motion parameters); 2) bandpass temporal  
640 filtering (0.01 Hz f 0.08 Hz); 3) spatial smoothing using a 4mm FWHM Gaussian kernel. After  
641 quality control, 496 subjects were finally included.

642 We then extracted the mean time course in each of the 42 regions and computed the pairwise  
643 Pearson's correlation coefficients to derive individual functional connectivity matrices. Normalized  
644 by Fisher's  $z$  transform, the functional connectivity matrices were averaged across subjects and  
645 converted back to correlations using inverse Fisher transform to generate the group functional  
646 connectivity matrix. All negative correlations in the resultant functional connectivity matrix were  
647 set to zero, having no influence on the agents' mobility pattern.

Integration of functional connectivity into the model should bias mobility of the agents towards

region pairs showing greater co-activation patterns. Agents thus have a higher chance of entering the edges that connect regions having stronger synchronous neuronal activity. More specifically, the weights  $w_{ij}$  (connection strength of structural connectivity) in equation (6) were scaled by  $e^{k \times fc_{(i,j)}}$ , where  $fc_{(i,j)}$  is the functional connectivity between region  $i$  and region  $j$ . Therefore the probability that agents move from region  $i$  to edge  $(i, j)$  per unit time is determined by

$$P_{\text{region } i \rightarrow \text{edge } (i,j)} = (1 - \rho_i) \frac{e^{k \times fc_{(i,j)}} w_{ij}}{\sum_j e^{k \times fc_{(i,j)}} w_{ij}} \quad (14)$$

648 Note that increasing  $k$  makes the influence of functional connectivity more differentiated across  
649 the edges: the stronger functional connectivity values will be enhanced while the weaker ones may  
650 be suppressed.

## 651 ACKNOWLEDGEMENTS

652 This research was undertaken thanks in part to funding from the Canada First Research Ex-  
653 cellence Fund, awarded to McGill University for the Healthy Brains for Healthy Lives initiative.  
654 AD received funding from the Canadian Institutes for Health Research, Natural Sciences and En-  
655 gineering Research Council of Canada, Michael J Fox Foundation, Weston Brain Institute, and  
656 the Alzheimer Association. BM acknowledges support from the Natural Sciences and Engineer-  
657 ing Research Council of Canada (NSERC Discovery Grant RGPIN #017-04265), the Fonds de  
658 recherche Québec – Santé (Chercheur Boursier) and the Canadian Institutes of Health Research  
659 (CIHR; Project Grant #391300). PPMI – a public-private partnership – is funded by the Michael J.  
660 Fox Foundation for Parkinson’s Research and funding partners, including AbbVie, Avid, Biogen,  
661 Bristol-Myers Squibb, Covance, GE Healthcare, Genentech, GlaxoSmithKline, Lilly, Lundbeck,  
662 Merck, Meso Scale Discovery, Pfizer, Piramal, Roche, Sanofi Genzyme, Servier, Teva, and UCB.

## 663 AUTHOR CONTRIBUTIONS

664 YQZ, BM, AD conceived the work; YQZ, YZhang, YY, YZeighami, KL, BM, AD aided in  
665 analysis and interpretation of data; YQZ wrote new software; YQZ, YY, BM, AD drafted the work.

## 666 REFERENCES



- 667 Aharon-Peretz, J., Rosenbaum, H., and Gershoni-Baruch, R. (2004). “Mutations in the glucocere-  
668 brosidase gene and parkinson’s disease in ashkenazi jews.” *New England Journal of Medicine*,  
669 351(19), 1972–1977.
- 670 Alcalay, R. N., Levy, O. A., Waters, C. H., Fahn, S., Ford, B., Kuo, S.-H., Mazzoni, P., Pauciulo,  
671 M. W., Nichols, W. C., Gan-Or, Z., et al. (2015). “Glucocerebrosidase activity in parkinson’s  
672 disease with and without gba mutations.” *Brain*, 138(9), 2648–2658.
- 673 Balcan, D., Gonçalves, B., Hu, H., Ramasco, J. J., Colizza, V., and Vespignani, A. (2010). “Mod-  
674 eling the spatial spread of infectious diseases: The global epidemic and mobility computational  
675 model.” *Journal of computational science*, 1(3), 132–145.
- 676 Braak, H., Del Tredici, K., Rüb, U., De Vos, R. A., Steur, E. N. J., and Braak, E. (2003). “Staging of  
677 brain pathology related to sporadic parkinson’s disease.” *Neurobiology of aging*, 24(2), 197–211.
- 678 Braak, H., Ghebremedhin, E., Rüb, U., Bratzke, H., and Del Tredici, K. (2004). “Stages in the  
679 development of parkinson’s disease-related pathology.” *Cell and tissue research*, 318(1), 121–  
680 134.
- 681 Brettschneider, J., Del Tredici, K., Lee, V. M.-Y., and Trojanowski, J. Q. (2015). “Spreading of  
682 pathology in neurodegenerative diseases: a focus on human studies.” *Nature Reviews Neuro-*  
683 *science*, 16(2), 109.
- 684 Brundin, P. and Kordower, J. H. (2012). “Neuropathology in transplants in parkinson’s disease:  
685 implications for disease pathogenesis and the future of cell therapy.” *Progress in brain research*,  
686 Vol. 200, Elsevier, 221–241.
- 687 Brundin, P. and Melki, R. (2017). “Prying into the prion hypothesis for parkinson’s disease.”  
688 *Journal of Neuroscience*, 37(41), 9808–9818.
- 689 Cammoun, L., Gigandet, X., Meskaldji, D., Thiran, J. P., Sporns, O., Do, K. Q., Maeder, P., Meuli,  
690 R., and Hagmann, P. (2012). “Mapping the human connectome at multiple scales with diffusion  
691 spectrum mri.” *Journal of neuroscience methods*, 203(2), 386–397.
- 692 Chartier-Harlin, M.-C., Kachergus, J., Roumier, C., Mouroux, V., Douay, X., Lincoln, S., Levecque,  
693 C., Larvor, L., Andrieux, J., Hulihan, M., et al. (2004). “ $\alpha$ -synuclein locus duplication as a cause

- 694 of familial parkinson's disease." *The Lancet*, 364(9440), 1167–1169.
- 695 Collins, D. L. and Evans, A. C. (1997). "Animal: validation and applications of nonlinear  
696 registration-based segmentation." *International journal of pattern recognition and artificial in-*  
697 *telligence*, 11(08), 1271–1294.
- 698 Coupé, P., Yger, P., Prima, S., Hellier, P., Kervrann, C., and Barillot, C. (2008). "An optimized  
699 blockwise nonlocal means denoising filter for 3-d magnetic resonance images." *IEEE transactions*  
700 *on medical imaging*, 27(4), 425–441.
- 701 Crossley, N. A., Mechelli, A., Scott, J., Carletti, F., Fox, P. T., McGuire, P., and Bullmore, E. T.  
702 (2014). "The hubs of the human connectome are generally implicated in the anatomy of brain  
703 disorders." *Brain*, 137(8), 2382–2395.
- 704 Damier, P., Hirsch, E., Agid, Y., and Graybiel, A. (1999). "The substantia nigra of the human  
705 brain: II. patterns of loss of dopamine-containing neurons in parkinson's disease." *Brain*, 122(8),  
706 1437–1448.
- 707 Desikan, R. S., Ségonne, F., Fischl, B., Quinn, B. T., Dickerson, B. C., Blacker, D., Buckner,  
708 R. L., Dale, A. M., Maguire, R. P., Hyman, B. T., et al. (2006). "An automated labeling system  
709 for subdividing the human cerebral cortex on mri scans into gyral based regions of interest."  
710 *Neuroimage*, 31(3), 968–980.
- 711 Fereshtehnejad, S.-M., Zeighami, Y., Dagher, A., and Postuma, R. B. (2017). "Clinical criteria  
712 for subtyping parkinson's disease: biomarkers and longitudinal progression." *Brain*, 140(7),  
713 1959–1976.
- 714 Fischl, B., Salat, D. H., Busa, E., Albert, M., Dieterich, M., Haselgrove, C., Van Der Kouwe, A.,  
715 Killiany, R., Kennedy, D., Klaveness, S., et al. (2002). "Whole brain segmentation: automated  
716 labeling of neuroanatomical structures in the human brain." *Neuron*, 33(3), 341–355.
- 717 Frias-Martinez, E., Williamson, G., and Frias-Martinez, V. (2011). "An agent-based model of  
718 epidemic spread using human mobility and social network information." *Privacy, Security,*  
719 *Risk and Trust (PASSAT) and 2011 IEEE Third International Conference on Social Computing*  
720 *(SocialCom), 2011 IEEE Third International Conference on, IEEE, 57–64.*

- 721 Goedert, M., Spillantini, M. G., Del Tredici, K., and Braak, H. (2013). “100 years of lewy  
722 pathology.” *Nature Reviews Neurology*, 9(1), 13.
- 723 Gollo, L. L., Roberts, J. A., Cropley, V. L., Di Biase, M. A., Pantelis, C., Zalesky, A., and  
724 Breakspear, M. (2018). “Fragility and volatility of structural hubs in the human connectome.”  
725 *Nature neuroscience*, 21(8), 1107.
- 726 Gorgolewski, K., Fox, A., Chang, L., Schäfer, A., Arélin, K., Burmann, I., Sacher, J., and Margulies,  
727 D. (2014). “Tight fitting genes: Finding relations between statistical maps and gene expression  
728 patterns.” *Organization for Human Brain Mapping. Hamburg, Germany*.
- 729 Guo, J. L. and Lee, V. M. (2014). “Cell-to-cell transmission of pathogenic proteins in neurodegen-  
730 erative diseases.” *Nature medicine*, 20(2), 130.
- 731 Hawrylycz, M. J., Lein, E. S., Guillozet-Bongaarts, A. L., Shen, E. H., Ng, L., Miller, J. A., Van  
732 De Lagemaat, L. N., Smith, K. A., Ebbert, A., Riley, Z. L., et al. (2012). “An anatomically  
733 comprehensive atlas of the adult human brain transcriptome.” *Nature*, 489(7416), 391.
- 734 Hilgetag, C. C. and Kaiser, M. (2004). “Clustered organization of cortical connectivity.” *Neuroin-  
735 formatics*, 2(3), 353–360.
- 736 Ibanez, P., Bonnet, A., Debarges, B., Lohmann, E., Tison, F., Agid, Y., Dürr, A., Brice, A., Pollak,  
737 P., Group, F. P. D. G. S., et al. (2004). “Causal relation between  $\alpha$ -synuclein locus duplication  
738 as a cause of familial parkinson’s disease.” *The Lancet*, 364(9440), 1169–1171.
- 739 Iturria-Medina, Y., Sotero, R. C., Toussaint, P. J., Evans, A. C., Initiative, A. D. N., et al. (2014).  
740 “Epidemic spreading model to characterize misfolded proteins propagation in aging and associ-  
741 ated neurodegenerative disorders.” *PLoS computational biology*, 10(11), e1003956.
- 742 Jackson, W. S. (2014). “Selective vulnerability to neurodegenerative disease: the curious case of  
743 prion protein.” *Disease models & mechanisms*, 7(1), 21–29.
- 744 Jbabdi, S. and Johansen-Berg, H. (2011). “Tractography: where do we go from here?.” *Brain  
745 connectivity*, 1(3), 169–183.
- 746 Jenkinson, M., Beckmann, C. F., Behrens, T. E., Woolrich, M. W., and Smith, S. M. (2012). “Fsl.”  
747 *Neuroimage*, 62(2), 782–790.

- 748 Jucker, M. and Walker, L. C. (2013). “Self-propagation of pathogenic protein aggregates in neu-  
749 rodegenerative diseases.” *Nature*, 501(7465), 45.
- 750 Keuken, M. C., Bazin, P.-L., Crown, L., Hootsmans, J., Laufer, A., Müller-Axt, C., Sier, R.,  
751 van der Putten, E., Schäfer, A., Turner, R., et al. (2014). “Quantifying inter-individual anatomical  
752 variability in the subcortex using 7t structural mri.” *NeuroImage*, 94, 40–46.
- 753 Kordower, J. H., Chu, Y., Hauser, R. A., Freeman, T. B., and Olanow, C. W. (2008). “Lewy  
754 body-like pathology in long-term embryonic nigral transplants in parkinson’s disease.” *Nature*  
755 *medicine*, 14(5), 504.
- 756 Luk, K. C., Kehm, V., Carroll, J., Zhang, B., O’Brien, P., Trojanowski, J. Q., and Lee, V. M.-  
757 Y. (2012). “Pathological  $\alpha$ -synuclein transmission initiates parkinson-like neurodegeneration in  
758 nontransgenic mice.” *Science*, 338(6109), 949–953.
- 759 Luna, E., Decker, S. C., Riddle, D. M., Caputo, A., Zhang, B., Cole, T., Caswell, C., Xie,  
760 S. X., Lee, V. M., and Luk, K. C. (2018). “Differential  $\alpha$ -synuclein expression contributes to  
761 selective vulnerability of hippocampal neuron subpopulations to fibril-induced toxicity.” *Acta*  
762 *neuropathologica*, 1–21.
- 763 Marek, K., Jennings, D., Lasch, S., Siderowf, A., Tanner, C., Simuni, T., Coffey, C., Kieburtz, K.,  
764 Flagg, E., Chowdhury, S., et al. (2011). “The parkinson progression marker initiative (ppmi).”  
765 *Progress in neurobiology*, 95(4), 629–635.
- 766 Maslov, S. and Sneppen, K. (2002). “Specificity and stability in topology of protein networks.”  
767 *Science*, 296(5569), 910–913.
- 768 Masuda-Suzukake, M., Nonaka, T., Hosokawa, M., Oikawa, T., Arai, T., Akiyama, H., Mann,  
769 D. M., and Hasegawa, M. (2013). “Prion-like spreading of pathological  $\alpha$ -synuclein in brain.”  
770 *Brain*, 136(4), 1128–1138.
- 771 Michel, P. P., Hirsch, E. C., and Hunot, S. (2016). “Understanding dopaminergic cell death pathways  
772 in parkinson disease.” *Neuron*, 90(4), 675–691.
- 773 Mišić, B., Betzel, R. F., Griffa, A., de Reus, M. A., He, Y., Zuo, X.-N., van den Heuvel, M. P.,  
774 Haggmann, P., Sporns, O., and Zatorre, R. J. (2018). “Network-based asymmetry of the human

- 775 auditory system.” *Cerebral Cortex*, 28(7), 2655–2664.
- 776 Mišić, B., Betzel, R. F., Nematzadeh, A., Goni, J., Griffa, A., Hagmann, P., Flammini, A., Ahn,  
777 Y.-Y., and Sporns, O. (2015). “Cooperative and competitive spreading dynamics on the human  
778 connectome.” *Neuron*, 86(6), 1518–1529.
- 779 Moore, C. and Newman, M. E. (2000). “Epidemics and percolation in small-world networks.”  
780 *Physical Review E*, 61(5), 5678.
- 781 Mougnot, A.-L., Nicot, S., Bencsik, A., Morignat, E., Verchère, J., Lakhdar, L., Legastelois,  
782 S., and Baron, T. (2012). “Prion-like acceleration of a synucleinopathy in a transgenic mouse  
783 model.” *Neurobiology of aging*, 33(9), 2225–2228.
- 784 Nematzadeh, A., Ferrara, E., Flammini, A., and Ahn, Y.-Y. (2014). “Optimal network modularity  
785 for information diffusion.” *Physical review letters*, 113(8), 088701.
- 786 Newman, M. (2010). *Networks: an introduction*. Oxford university press.
- 787 Paillusson, S., Clairembault, T., Biraud, M., Neunlist, M., and Derkinderen, P. (2013). “Activity-  
788 dependent secretion of alpha-synuclein by enteric neurons.” *Journal of neurochemistry*, 125(4),  
789 512–517.
- 790 Peelaerts, W., Bousset, L., Van der Perren, A., Moskalyuk, A., Pulizzi, R., Giugliano, M., Van  
791 Den Haute, C., Melki, R., and Baekelandt, V. (2015). “ $\alpha$ -synuclein strains cause distinct synu-  
792 cleinopathies after local and systemic administration.” *Nature*, 522(7556), 340.
- 793 Polymenidou, M. and Cleveland, D. W. (2012). “Prion-like spread of protein aggregates in neu-  
794 rodegeneration.” *Journal of Experimental Medicine*, 209(5), 889–893.
- 795 Raj, A., Kuceyeski, A., and Weiner, M. (2012). “A network diffusion model of disease progression  
796 in dementia.” *Neuron*, 73(6), 1204–1215.
- 797 Rey, N. L., George, S., Steiner, J. A., Madaj, Z., Luk, K. C., Trojanowski, J. Q., Lee, V. M.-Y., and  
798 Brundin, P. (2018). “Spread of aggregates after olfactory bulb injection of  $\alpha$ -synuclein fibrils is  
799 associated with early neuronal loss and is reduced long term.” *Acta neuropathologica*, 135(1),  
800 65–83.
- 801 Rey, N. L., Steiner, J. A., Maroof, N., Luk, K. C., Madaj, Z., Trojanowski, J. Q., Lee, V. M.-Y.,

- 802 and Brundin, P. (2016). “Widespread transneuronal propagation of  $\alpha$ -synucleinopathy triggered  
803 in olfactory bulb mimics prodromal parkinson’s disease.” *Journal of Experimental Medicine*,  
804 jem–20160368.
- 805 Roberts, J. A., Perry, A., Lord, A. R., Roberts, G., Mitchell, P. B., Smith, R. E., Calamante, F., and  
806 Breakspear, M. (2016). “The contribution of geometry to the human connectome.” *Neuroimage*,  
807 124, 379–393.
- 808 Rubinov, M. and Sporns, O. (2010). “Complex network measures of brain connectivity: uses and  
809 interpretations.” *Neuroimage*, 52(3), 1059–1069.
- 810 Seeley, W. W., Crawford, R. K., Zhou, J., Miller, B. L., and Greicius, M. D. (2009). “Neurodegen-  
811 erative diseases target large-scale human brain networks.” *Neuron*, 62(1), 42–52.
- 812 Seguin, C., van den Heuvel, M. P., and Zalesky, A. (2018). “Navigation of brain networks.”  
813 *Proceedings of the National Academy of Sciences*, 201801351.
- 814 Sidransky, E. and Lopez, G. (2012). “The link between the gba gene and parkinsonism.” *The Lancet*  
815 *Neurology*, 11(11), 986–998.
- 816 Singleton, A., Farrer, M., Johnson, J., Singleton, A., Hague, S., Kachergus, J., Hulihan, M.,  
817 Peuralinna, T., Dutra, A., Nussbaum, R., et al. (2003). “ $\alpha$ -synuclein locus triplication causes  
818 parkinson’s disease.” *Science*, 302(5646), 841–841.
- 819 Sled, J. G., Zijdenbos, A. P., and Evans, A. C. (1998). “A nonparametric method for automatic  
820 correction of intensity nonuniformity in mri data.” *IEEE transactions on medical imaging*, 17(1),  
821 87–97.
- 822 Spillantini, M. G., Crowther, R. A., Jakes, R., Hasegawa, M., and Goedert, M. (1998). “ $\alpha$ -  
823 synuclein in filamentous inclusions of lewy bodies from parkinson’s disease and dementia with  
824 lewy bodies.” *Proceedings of the National Academy of Sciences*, 95(11), 6469–6473.
- 825 Sporns, O. and Betzel, R. F. (2016). “Modular brain networks.” *Annual review of psychology*, 67,  
826 613–640.
- 827 Surmeier, D. J., Obeso, J. A., and Halliday, G. M. (2017). “Selective neuronal vulnerability in  
828 parkinson disease.” *Nature Reviews Neuroscience*, 18(2), 101.

- 829 van den Heuvel, M. P., Kahn, R. S., Goñi, J., and Sporns, O. (2012). “High-cost, high-capacity  
830 backbone for global brain communication.” *Proceedings of the National Academy of Sciences*,  
831 109(28), 11372–11377.
- 832 Van Essen, D. C., Smith, S. M., Barch, D. M., Behrens, T. E., Yacoub, E., Ugurbil, K., Consortium,  
833 W.-M. H., et al. (2013). “The wu-minn human connectome project: an overview.” *Neuroimage*,  
834 80, 62–79.
- 835 Volpicelli-Daley, L. A., Luk, K. C., Patel, T. P., Tanik, S. A., Riddle, D. M., Stieber, A., Meaney,  
836 D. F., Trojanowski, J. Q., and Lee, V. M.-Y. (2011). “Exogenous  $\alpha$ -synuclein fibrils induce lewy  
837 body pathology leading to synaptic dysfunction and neuron death.” *Neuron*, 72(1), 57–71.
- 838 Walsh, D. M. and Selkoe, D. J. (2016). “A critical appraisal of the pathogenic protein spread  
839 hypothesis of neurodegeneration.” *Nature Reviews Neuroscience*, 17(4), 251.
- 840 Watts, D. J. and Strogatz, S. H. (1998). “Collective dynamics of ‘small-world’ networks.” *nature*,  
841 393(6684), 440.
- 842 Weickenmeier, J., Kuhl, E., and Goriely, A. (2018). “Multiphysics of prionlike diseases: Progression  
843 and atrophy.” *Phys. Rev. Lett.*, 121, 158101.
- 844 Yau, Y., Zeighami, Y., Baker, T., Larcher, K., Vainik, U., Dadar, M., Fonov, V., Hagmann, P.,  
845 Griffa, A., Mišić, B., et al. (2018). “Network connectivity determines cortical thinning in early  
846 parkinson’s disease progression.” *Nature communications*, 9(1), 12.
- 847 Yeh, F.-C. and Tseng, W.-Y. I. (2011). “Ntu-90: a high angular resolution brain atlas constructed  
848 by q-space diffeomorphic reconstruction.” *Neuroimage*, 58(1), 91–99.
- 849 Yeh, F.-C., Verstynen, T. D., Wang, Y., Fernández-Miranda, J. C., and Tseng, W.-Y. I. (2013).  
850 “Deterministic diffusion fiber tracking improved by quantitative anisotropy.” *PloS one*, 8(11),  
851 e80713.
- 852 Yeh, F.-C., Wedeen, V. J., and Tseng, W.-Y. I. (2010). “Generalized  $q$ -sampling imaging.” *IEEE*  
853 *transactions on medical imaging*, 29(9), 1626–1635.
- 854 Zeighami, Y., Ulla, M., Iturria-Medina, Y., Dadar, M., Zhang, Y., Larcher, K. M.-H., Fonov, V.,  
855 Evans, A. C., Collins, D. L., and Dagher, A. (2015). “Network structure of brain atrophy in de

856 novo parkinson's disease." *Elife*, 4.

857 Zhang, Y., Larcher, K. M.-H., Mistic, B., and Dagher, A. (2017). "Anatomical and functional

858 organization of the human substantia nigra and its connections." *Elife*, 6, e26653.



859

## SUPPLEMENTARY INFORMATION

860

### Parameter List

| notation     | name                                       | expression or value                                        | explanation                                                                                                  |
|--------------|--------------------------------------------|------------------------------------------------------------|--------------------------------------------------------------------------------------------------------------|
| $\Delta t$   | time step                                  | $\Delta t = 0.01$                                          | time increment in the simulations                                                                            |
| $i$          | region index                               | N/A                                                        | used to index regions                                                                                        |
| $(i, j)$     | edge label                                 | N/A                                                        | used to index edges                                                                                          |
| $N_i$        | normal population in region $i$            | N/A                                                        | total number of normal agents in region $i$                                                                  |
| $M_i$        | misfolded population in region $i$         | N/A                                                        | total number of misfolded agents in region $i$                                                               |
| $N_{(i,j)}$  | normal population in edge $(i, j)$         | N/A                                                        | total number of normal agents in edge $(i, j)$                                                               |
| $M_{(i,j)}$  | misfolded population in edge $(i, j)$      | N/A                                                        | total number of misfolded agents in edge $(i, j)$                                                            |
| $\alpha_i$   | synthesis rate in region $i$               | $\alpha_i = \Phi_{0,1}(SNCAexpression_i)$                  | the probability that a new normal agent gets synthesized in each voxel of region $i$ per unit time           |
| $\beta_i$    | clearance rate in region $i$               | $\alpha_i = \Phi_{0,1}(GBAexpression_i)$                   | the probability that an existing agent (either normal or misfolded) in region $i$ gets cleared per unit time |
| $S_i$        | region size                                | N/A                                                        | voxel counts of region $i$                                                                                   |
| $\gamma_i^0$ | baseline transmission rate                 | $\gamma_i^0 = 1/S_i$                                       | the probability for a single misfolded agent to transmit the disease to other agents per unit time           |
| $\gamma_i$   | transmission probability                   | $1 - e^{M_i \ln(1-\gamma_i^0)}$                            | the probability that normal agents get infected (by at least one of the misfolded agents) per unit time      |
| $w_{ij}$     | connection strength of edge $(i, j)$       | normalized fiber tracts density between region $i$ and $j$ | determining the probability of choosing edge $(i, j)$ when exiting region $i$ per unit time                  |
| $l_{ij}$     | edge length of edge $(i, j)$               | mean length of fiber tracts between region $i$ and $j$     | determining the probability of exiting edge $(i, j)$ per unit time                                           |
| $\rho_i$     | the probability of remaining in region $i$ | $\rho_i = 0.5$ for all $i$                                 | Agents in region $i$ have equal probability of remaining in region $i$ or exiting region $i$ per unit time   |
| $fc_{ij}$    | functional connectivity of edge $(i, j)$   | N/A                                                        | biasing agents toward regions showing greater co-activation pattern                                          |
| $k$          | weight of functional connectivity          | N/A                                                        | controlling the influence of functional connectivity in driving disease spread                               |

|          |                                                                        |                                     |                                                                                                                                                   |
|----------|------------------------------------------------------------------------|-------------------------------------|---------------------------------------------------------------------------------------------------------------------------------------------------|
| $k_1$    | weight of atrophy accrual due to native misfolded agents' accumulation | $k_1 + k_2 = 1$                     | controlling the contribution of native misfolded agents' accumulation to total atrophy growth                                                     |
| $k_2$    | weight of atrophy accrual due to deafferentation                       | $k_1 + k_2 = 1$                     | controlling the contribution of deafferentation to total atrophy growth.                                                                          |
| $r_i(t)$ | the ratio of misfolded agents in region $i$                            | $r_i(t) = M_i(t)/(N_i(t) + M_i(t))$ | measuring the burden of misfolded agents in region $i$ at $t$ . $1 - e^{-r_i(t)\Delta t}$ is the increment of neuronal death at $t$ in region $i$ |

**TABLE S1. Parameter List** | Note that only  $k$ ,  $\rho_i$ ,  $k_1$ ,  $k_2$  are free parameters:  $k$  was scanned from 0 to 5 to study the effect of functional connectivity on disease spread (FIG. 7);  $\rho_i = 0.5$  for all the regions so that agents have equal chance of staying in the same region or moving out;  $k_1 = k_2 = 0.5$  so that the two factors ((i) native misfolded  $\alpha$ -synuclein accumulation; (ii) deafferentation from connected regions) contributed equally to the total atrophy growth. We also note that model fit is robust across multiple choices of  $\rho_i$ ,  $k_1$ ,  $k_2$  (FIG. S8).

## 861 Analysis of the fixed points

862 Although there is no analytical solution for  $\alpha$ -synuclein concentration, phase plane analysis is  
863 helpful in finding fixed points of the system. Considering that the rates of incoming and outgoing  
864 agents in the edges are equal when the system is at the stable point, and that no clearance, synthesis,  
865 or misfolding occurs in the edges, the effects of the propagation module are negligible in the analysis  
866 of the system's fixed points. Therefore, we sought to use the "overall" or "total" synthesis rate ( $\alpha$ ),  
867 normal agent clearance rate ( $\beta_1$ ), misfolded agent clearance rate ( $\beta_2$ ), and transmission rate ( $\gamma$ ) to  
868 approximately analyze the entire system using a series of differential equations (equation (S1)-(S3),  
869 see below). Likewise, we use  $N$ ,  $M$  to represent the total population of normal and misfolded agents  
870 in the entire brain.  $\beta_1, \beta_2, \gamma$  depend on the actual  $N_i, M_i$  and thus are not static values (to see this,  
871 for example, the total cleared normal agents per unit time is  $\sum_i \beta_i N_i$ , so the "overall" clearance rate  
872  $\beta_1 = \sum_i \beta_i N_i / N$  depends on real-time  $N_i$ ; it is not the "real" clearance rate but an approximation of  
873 the total rate of clearance); the total synthesis rate  $\alpha = \sum_i \alpha_i S_i$ , where  $\alpha_i$  is the empirical synthesis  
874 rate in region  $i$  in the formal model and  $S_i$  is region size. Note that the actual spreading dynamics  
875 cannot be fully described by the following differential equations (S1)-(S3). However, they are  
876 helpful in analyzing the possible states of disease propagation.

- **Growth of Normal  $\alpha$ -synuclein.** The system of normal  $\alpha$ -synuclein growth approximates like:

$$\frac{dN}{dt} = \alpha - \beta_1 N \quad (\text{S1})$$

877 with  $\alpha \gg 1, 0 < \beta_1 < 1$ , obviously  $N = \alpha/\beta_1$  is a stable point (which is the baseline density  
878 of endogenous  $\alpha$ -synuclein, FIG. 4, blue line).

- **Spread of misfolded  $\alpha$ -syn.** The system with misfolded agents injected behaves like:

$$\frac{dN}{dt} = \alpha - \beta_1 N - (1 - \beta_1)[1 - (1 - \gamma)^M]N \quad (\text{S2})$$

$$\frac{dM}{dt} = (1 - \beta_1)[1 - (1 - \gamma)^M]N - \beta_2 M \quad (\text{S3})$$

The nullclines of  $N, M$  are

$$M = \frac{\ln\left(\frac{N-\alpha}{N(1-\beta_1)}\right)}{\ln(1-\gamma)} \quad (\text{S4})$$

$$N = \frac{\beta_2 M}{(1-\beta_1)(1-(1-\gamma)^M)} \quad (\text{S5})$$

Note (S5) is not defined at  $M = 0$ . To study the number of fixed points and their positions, we need to find out the number of intersections of the two nullclines (S4) and (S5), and where they intersect. Adding (S2) and (S3), it is easy to see  $(N, M) = (\alpha/\beta_1, 0)$  is one fixed point. It is easy to find that  $M$  decreases monotonously with  $N$  in (S4) and passes  $(\alpha/\beta_1, 0)$ . Therefore, the monotony and position of line (S5) relative to line (S4) becomes crucial. To find the monotony of (S5), we take its first order derivative

$$N' = \frac{\beta_2(1-\beta_1)[(1-(1-\gamma)^M) + M(1-\gamma)^M \ln(1-\gamma)]}{[(1-\beta_1)(1-(1-\gamma)^M)]^2} \quad (\text{S6})$$

Obviously, when  $M = 0$ , the first order derivative is 0. We then take the second derivative

$$N'' = C(\ln(1-\gamma))^2(1-\gamma)^M M \quad (\text{S7})$$

879 where  $C$  is a positive constant. When  $M > 0$ , (S7) is positive thus the first order derivative  
 880 (S5) increases monotonously with  $M$ , and when  $M < 0$ , (S5) decreases monotonously  
 881 with  $M$ . Therefore, (S6) is positive hence in (S5),  $N$  increases monotonously with  $M$ ,  
 882 namely, there can be up to one intersection (denoted by  $(N^*, M^*)$  in the following) of the  
 883 two nullclines apart from  $(N, M) = (\alpha/\beta_1, 0)$ . It determines that the system can have up  
 884 to two fixed points, one is  $(\alpha/\beta_1, 0)$ , and the other is  $(N^*, M^*)$  which has no closed-form  
 885 expression.

886 It is also important to find out the position of  $(N^*, M^*)$ , because  $M^* < 0$  is not  
 887 realistic in the actual disease spread. Under this condition, an outbreak can never take  
 888 place. Take the limit of (S5)  $\lim_{M \rightarrow 0} N = \beta_2/(\beta_1 - 1) \ln(1 - \gamma)$ , we can see the intercept

889 of (S5) on the  $N$  axis is  $\beta_2/(\beta_1 - 1)\ln(1 - \gamma)$ . When (i)  $\beta_2 = (\beta_1 - 1)\ln(1 - \gamma)\alpha/\beta_1$ ,  
 890  $N^* = \alpha/\beta_1$ , i.e.,  $(N^*, M^*)$  “merges” with  $(\alpha/\beta_1, 0)$ ; (ii) when  $\beta_2 > (\beta_1 - 1)\ln(1 - \gamma)\alpha/\beta_1 = 0$ ,  
 891  $N^* > \alpha/\beta_1, M^* < 0$  which is not realistic; (iii) when  $\beta_2 < (\beta_1 - 1)\ln(1 - \gamma)\alpha/\beta_1 = 0$ ,  
 892  $N^* < \alpha/\beta_1, M^* > 0$ . Our results (with full spread in the end) are based on (iii).

893 To study why different choice of seed region and injected  $\alpha$ -synuclein may lead to  
 894 different states (extinction or outbreak), we also investigated on what conditions the fixed  
 895 points are stable. This can be studied by taking the jacobian matrix of the system linearized  
 896 around the fixed points:

$$J = \begin{pmatrix} -\beta_1 - (1 - \beta_1)[1 - (1 - \gamma)^M] & (1 - \beta_1)(1 - \gamma)^M \ln(1 - \gamma)N \\ (1 - \beta_1)[1 - (1 - \gamma)^M] & -\beta_2 - (1 - \beta_1)(1 - \gamma)^M \ln(1 - \gamma)N \end{pmatrix} \quad (S8)$$

897 At  $(\alpha/\beta_1, 0)$ ,  $J|_{(\alpha/\beta_1, 0)} = \begin{pmatrix} -\beta_1 & (1 - \beta_1)\ln(1 - \gamma)\frac{\alpha}{\beta_1} \\ 0 & -\beta_2 - (1 - \beta_1)\ln(1 - \gamma)\frac{\alpha}{\beta_1} \end{pmatrix}$  has eigenvalues  $-\beta_1$  and  $-\beta_2 -$   
 898  $(1 - \beta_1)\ln(1 - \gamma)\alpha/\beta_1$ . When  $\beta_2 > (\beta_1 - 1)\ln(1 - \gamma)\alpha/\beta_1$ , both eigenvalues are negative  
 899 hence  $(\alpha/\beta_1, 0)$  is stable (disease extinction). The injection of misfolded agents introduces  
 900 a small perturbation to the system at  $(\alpha/\beta_1, 0)$ . As the choice of seed region and injection  
 901 amount affect the approximations of  $\beta_1, \beta_2, \gamma$  in equation (S2)(S3) that are used to analyze  
 902 the system, the disease will either die out or fully spread. It is more difficult to initiate the  
 903 disease spread in seed regions with relatively large  $\beta_1, \beta_2$  and small  $\gamma$  (i.e., more resistant  
 904 to disease spread), as it is more likely to satisfy the condition  $\beta_2 > (\beta_1 - 1)\ln(1 - \gamma)\alpha/\beta_1$   
 905 initially. As mentioned before,  $\beta_1, \beta_2, \gamma$  are not static and depend on the real-time  $N_i, M_i$ s;  
 906 at the other fixed point  $(N^*, M^*)$ , the parameter set is not the same as the one near  $(\alpha/\beta_1, 0)$ .  
 907 Therefore it is also possible, in theory, that certain choices of parameters may lead to an  
 908 outbreak followed by gradual extinction.

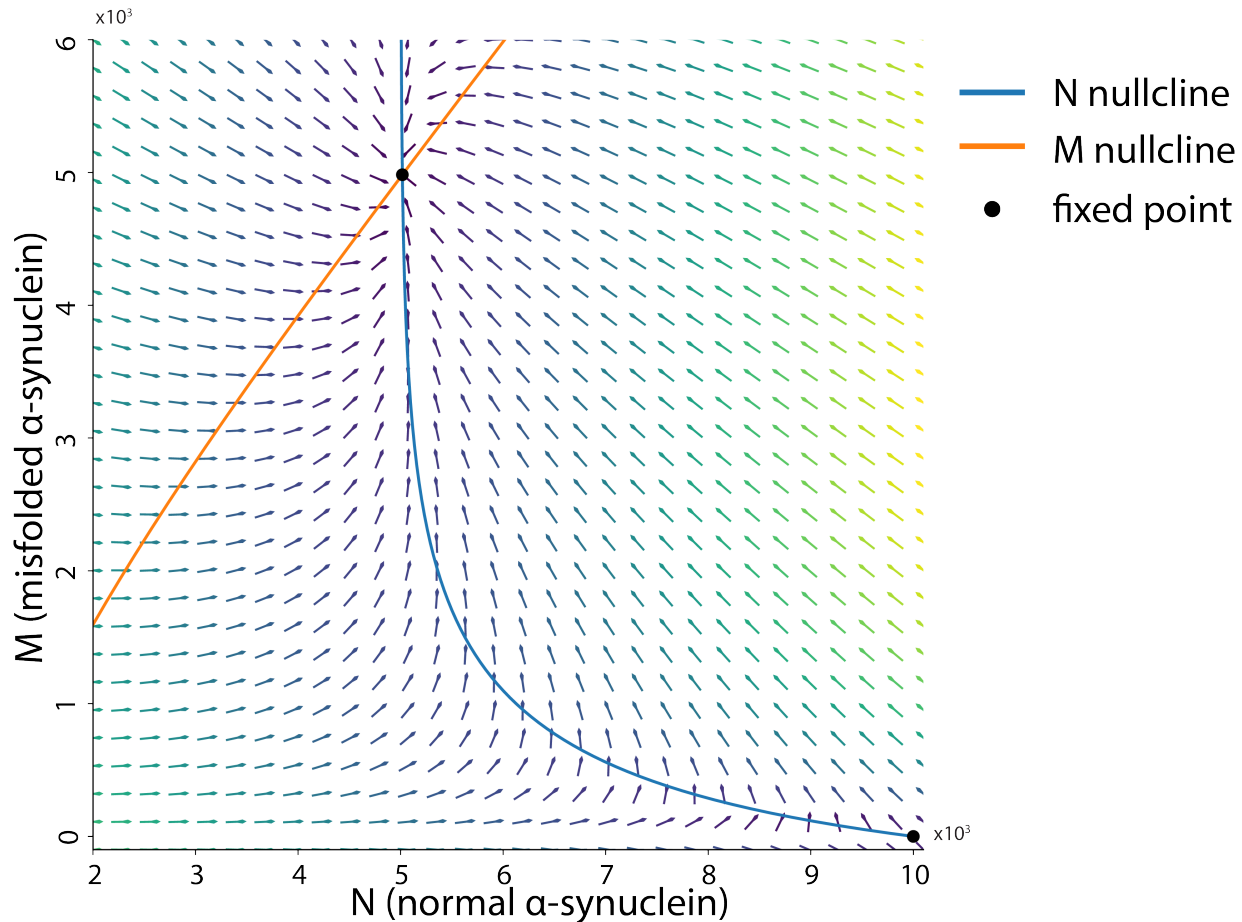

**Fig. S1. An illustration of the phase plane at  $\alpha = 5000, \beta_1 = 0.5, \beta_2 = 0.5, \gamma = 0.001$ .** | M decreases with N (N nullcline, blue, equation (S4)) and N increases with M (M nullcline, orange, equation (S5)), therefore apart from  $(N = 10000, M = 0)$  there is only one another intersection  $(N = 5017.15, M = 4982.85)$  of the two lines, indicating that the system has two fixed points only. The vector field (arrows) denotes the direction of the gradient at each position (i.e., the system at that point will move along the direction of the corresponding arrow).

909

### Model fit in large $t$

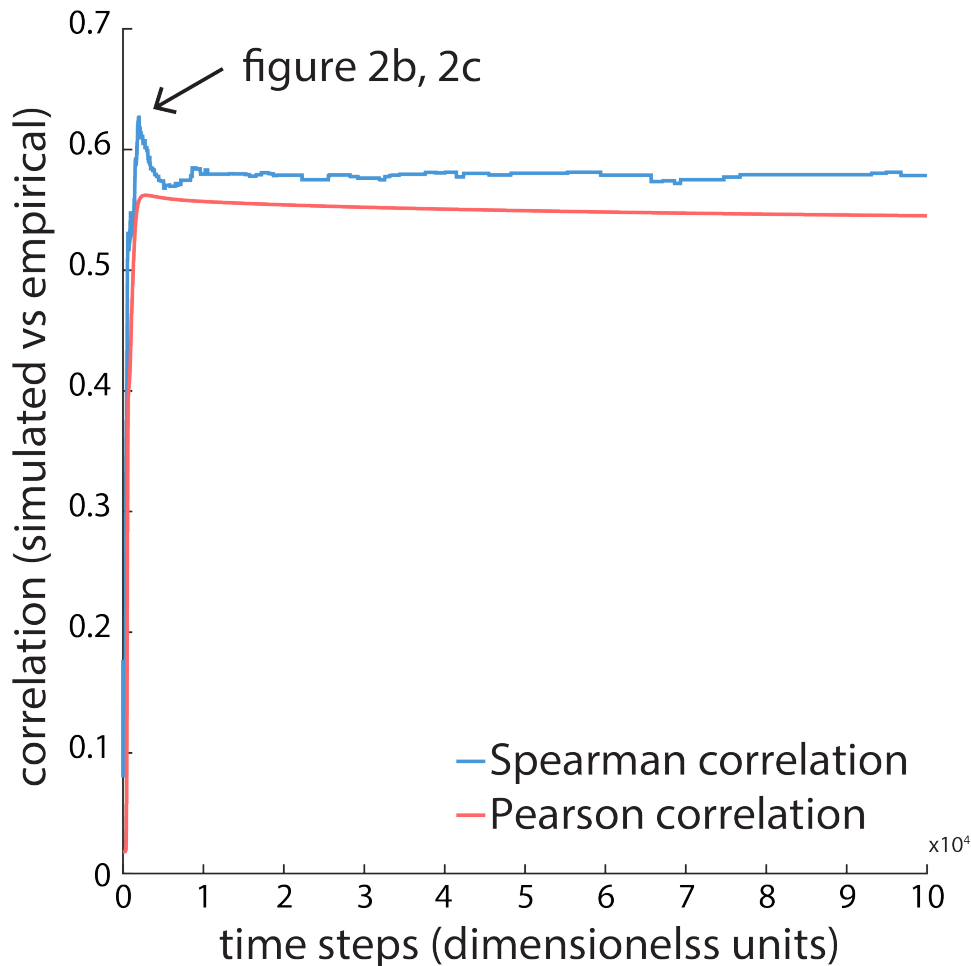

**Fig. S2. Model fit up to  $t = 10^5$**  | Correlations between simulated atrophy and empirical atrophy derived from PD patient DBM maps. Correlations are shown as a function of simulation time. At large  $t$ , the model fit stabilizes as the system approaches the stable point.

910

### Arrival time of misfolded $\alpha$ -synuclein compared to the Braak model

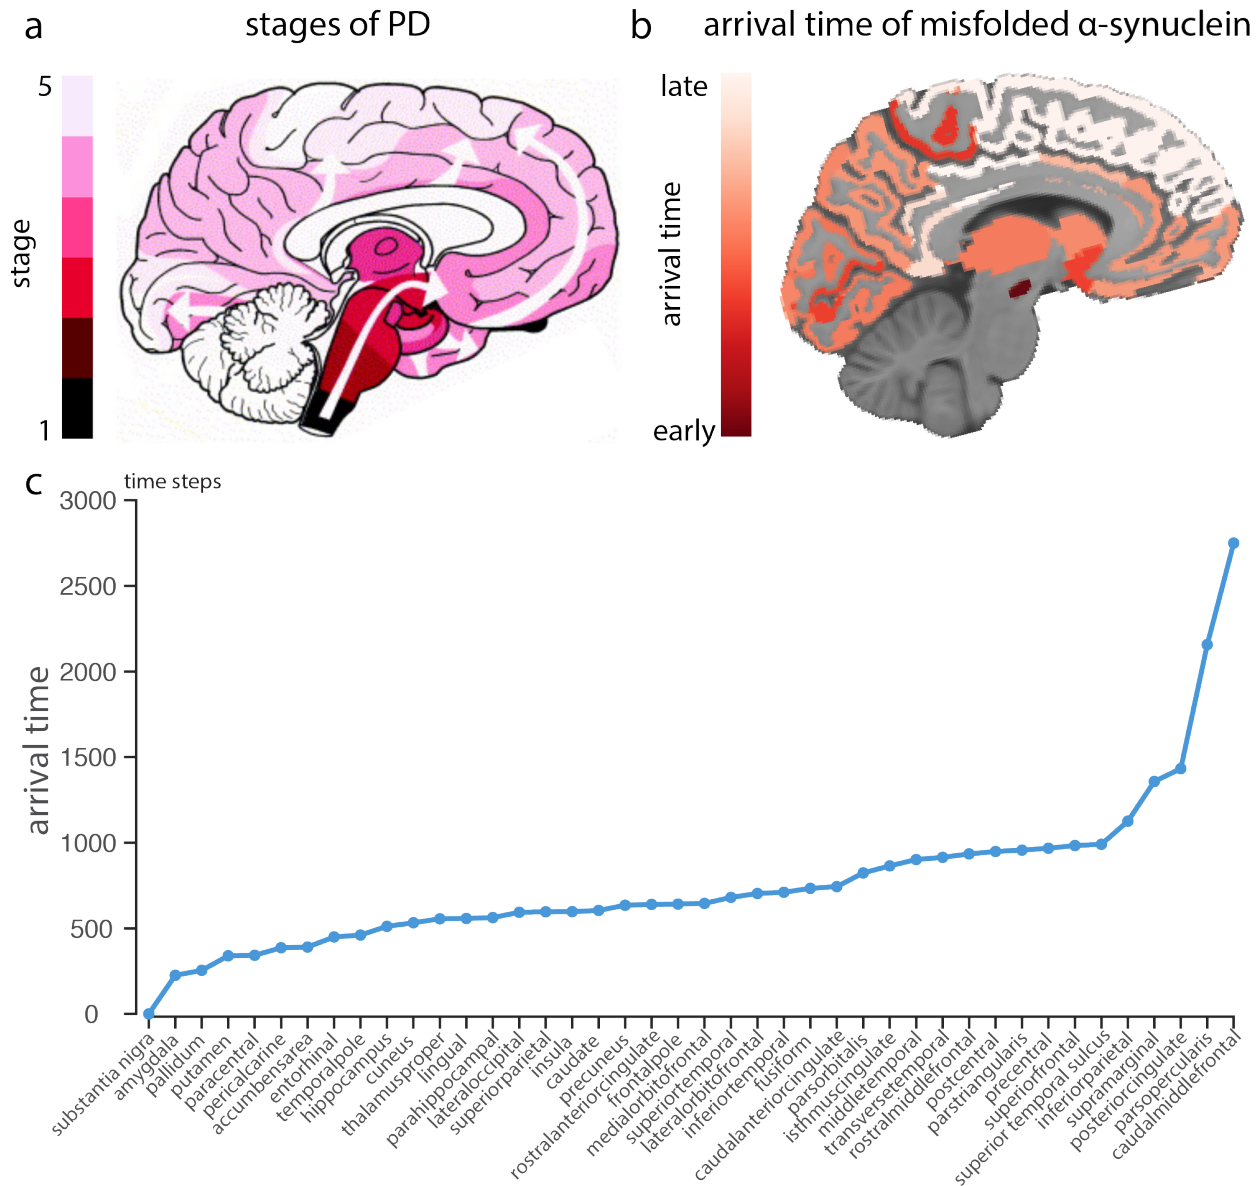

**Fig. S3. Comparison between stages of PD and arrival time of misfolded  $\alpha$ -synuclein in the model.** (a) The stages of PD progression proposed by Braak. (b) Regional arrival time of misfolded  $\alpha$ -synuclein is defined as the time steps required for misfolded  $\alpha$ -synuclein amount to exceed 1 (after seeding at the substantia nigra with one misfolded agent). This roughly follows the Braak staging hypothesis. (c) Line chart of regional arrival time of misfolded  $\alpha$ -synuclein.



## 911 **Spearman's correlation vs Pearson's Correlation**

912 . We adopted Spearman's correlation to assess model fit instead of Pearson's correlation. Al-  
913 though assessing model fit using Spearman's correlation takes into account only relative magnitudes  
914 of simulated neuronal loss and inevitably discards the information of data points' values, thus can  
915 be sensitive to small changes that alter the rank order of regional neuronal loss, it is better capable  
916 of capturing the similarity of the rank orders between two variables. It is preferred in our present  
917 study as it measures the resemblance between the simulated atrophy and empirical atrophy as to  
918 which region(s) display more atrophy compared to other regions. Moreover, the simulated neuronal  
919 loss does not exhibit a normal distribution pattern, making the Pearson's correlation less suitable  
920 in our study. However, to ensure the robustness of model fit, we also derived Pearson's correlations  
921 across the same set of network densities, which all yield comparable results (FIG. S4). Also note  
922 that, considering that the low spatial resolution of structural MRI scans of PD patients may cause  
923 inaccuracy in assessing the atrophy in substantia nigra, it was excluded in the correlations.

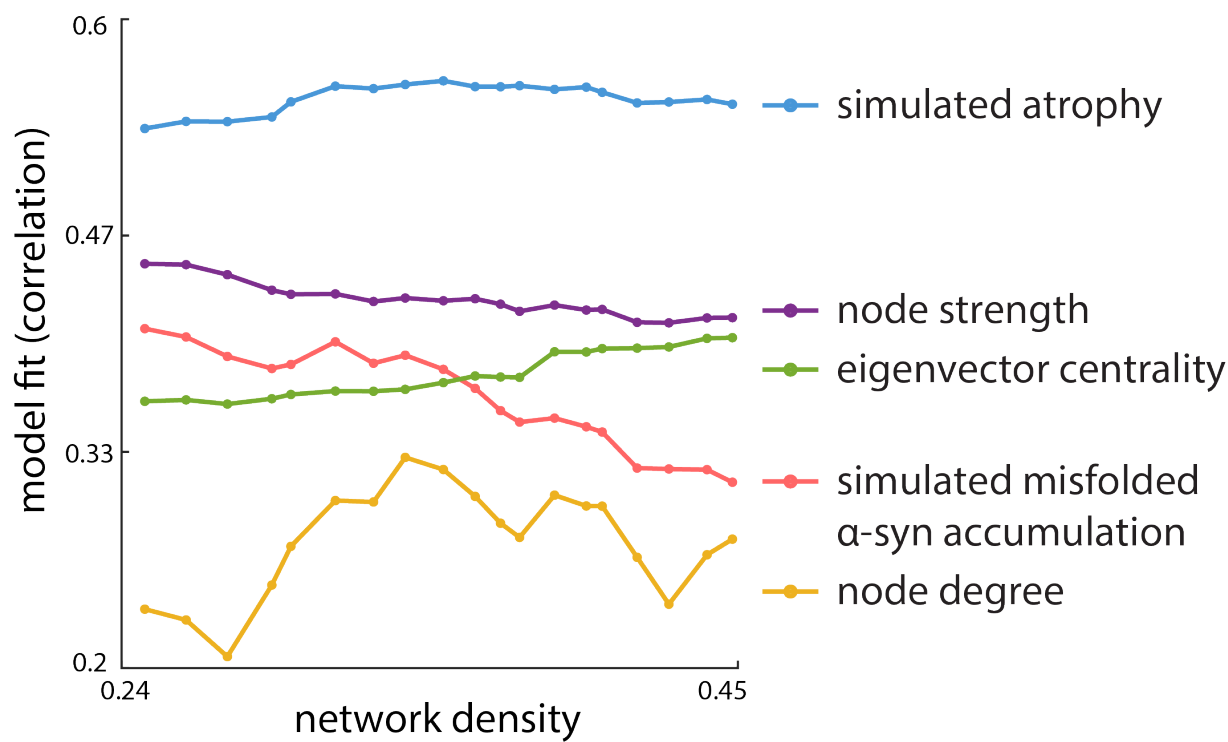

**Fig. S4. Model fit based on Pearson's correlation coefficient yielded comparable results across network density from 25% to 45% |** The model integrated with gene expression levels has more predictive power than the density of misfolded  $\alpha$ -synuclein (red) and the static network metrics, including node degree (yellow), node strength (green), or eigenvector (purple) centrality.

924 **Cutoff of the early-spreading timeframes**

925 . The sensitivity of Spearman's correlation to rank orders may be problematic in the early  
926 spreading period, as the measure takes in ranking information only so that even small increments  
927 that alter ranking order of the original neuronal loss may cause substantial changes to model fit.  
928 Therefore, to avoid picking up spurious peak correlation value (model fit) in the early timeframes  
929 after seeding, we discarded the timeframes where change of misfolded  $\alpha$ -synuclein densities exceeds  
930 1% within  $\Delta t = 0.01$  in at least one region, resulting in a cutoff point at around 1000 time steps  
931 depending on the network density.

932 We also adopted a less rigorous cutoff point, removing only the first 100 timeframes. The  
933 difference in results is negligible (FIG. S5).

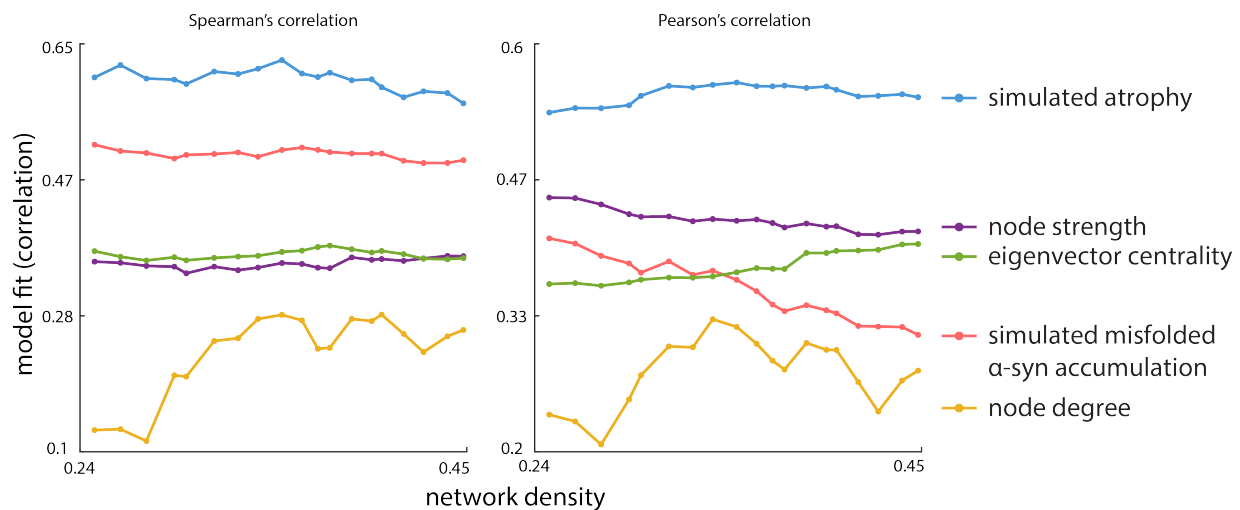

**Fig. S5.** The model fit across network density 25% to 45% after removing the first 100 timeframes in finding the peak correlation values. Left: Spearman's correlation. Right: Pearson's correlation.

934 **Permutation test of functional connectivity**

935 As the influence of functional connectivity increases, the variances of model fit based on null  
936 functional connectivity matrices increase while the means consistently drop across four network  
937 densities without displaying a curved pattern, indicating that only real functional connectivity  
938 significantly facilitates model fit at smaller  $k$  (FIG. S6). At larger  $k$ , simulations based on real  
939 functional connectivity may yield model fit lower than the mean of null models, indicating that the  
940 harmful role of functional connectivity when it begins to erode structural connectivity structure  
941 may make the model perform worse than chance. The variance of null model fits increases as  $k$   
942 goes up, increasing the occurrence of high model fit values.

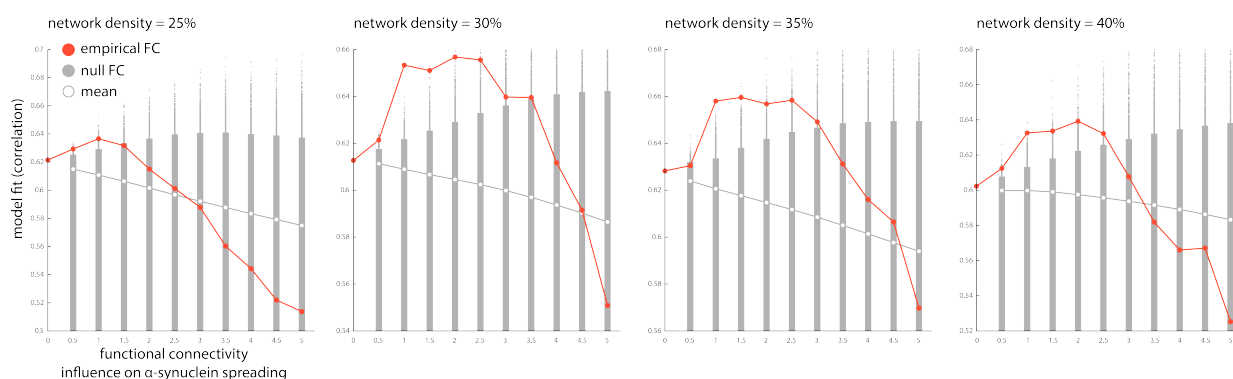

**Fig. S6. Permutation tests for functional connectivity (FC).** Increasing  $k$  (the influence of FC) first facilitates then degrades model fit. The red line indicates model fit using true FC values. At each  $k$ , rs-fMRI time series were re-assigned to construct null FC matrices, which degrades model fit monotonously as  $k$  increases. At smaller  $k$ , simulations based on real FC yield significantly higher model fit than the null settings as indicated by the 95% confidence interval (gray bar), while at larger  $k$ , real FC ceases to have advantage over null FC matrices in facilitating model fit and can even become significantly more harmful than the nulls.

943 **Gene expression**

944 There are three probes for *GBA* (probe id: 1025372, 1025373, 1025374) and two probes for  
 945 *SNCA* (probe id: 1020182, 1010655) (FIG. S7). *GBA* probe 1025374 was excluded in the analysis as  
 946 it deviates too much from probe 1025372 (Pearson correlation=0.30) and probe 1025373 (Pearson  
 947 correlation=0.24) while the correlation between the latter two probes is 0.79. Compared to *GBA*  
 948 expression, *SNCA* is more homogenous especially in cortical regions.

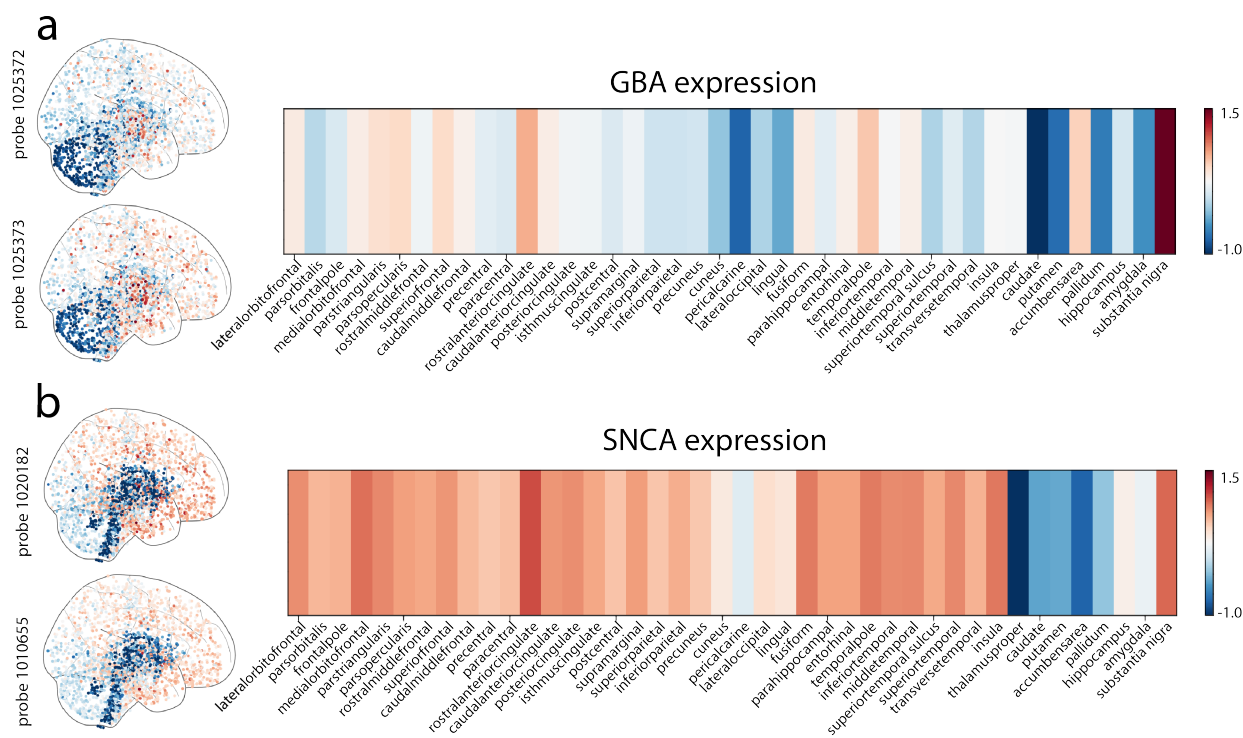

**Fig. S7.** (a) Regional *GBA* expression. Probe 1025372, 1025373 were included to generate the group transcription profile. (b) Regional *SNCA* expression. Probe 1020182, 1010655 were included to generate the group transcription profile.

949

## The effect of free parameters on model fit

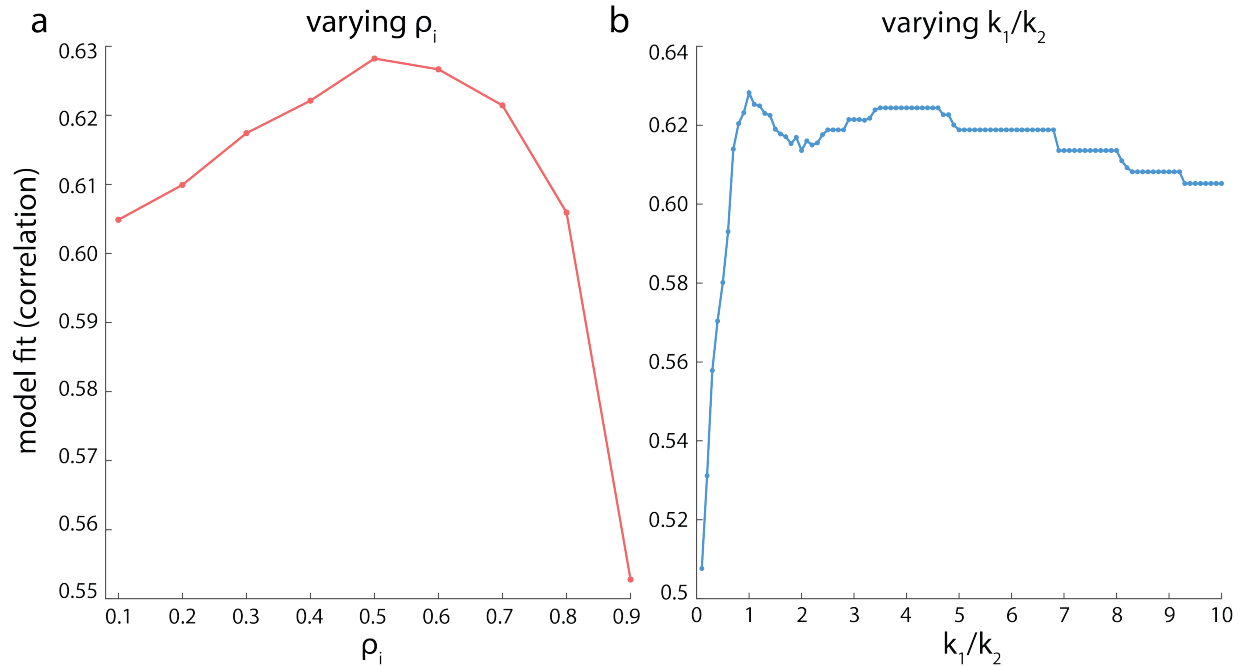

**Fig. S8. Testing free parameters  $\rho_i, k_1, k_2$  | Model fit (Spearman's correlation) is robust to variations in  $\rho_i, k_1, k_2$  (results shown at network density 0.35). (a)  $\rho_i$  controls the probability of remaining in region  $i$  while  $(1-\rho_i)$  is the probability of exiting region  $i$  per unit time. The main results are based on  $\rho_i = 0.5$ . However, the model fit is consistently above 0.55 across  $\rho_i$  ranging from 0.1 to 0.9. (b) For the atrophy in region  $i$ ,  $k_1$  controls the contribution of  $\alpha$ -synuclein accumulation inside region  $i$ , while  $k_2$  controls the contribution of deafferentation induced by atrophy in connected regions.  $k_1 + k_2 = 1$ . The model fit is consistently over 0.5 across  $k_1/k_2$  ranging from 0.1 to 10. These results suggest that the predicative power of the model is robust to variations in free parameters  $\rho_i$  or  $k_1/k_2$ .**
