# Supplementary material for: Local vulnerability and global connectivity jointly shape neurodegenerative disease propagation
Source: bioRxiv preprint, doi:10.1101/449199, version 2 (2019-11-01)
Supplement: S1 Table [file 449199_file10.docx]

| **Notation** | **Name** | **Epxression or value** | **Explanation** |
| --- | --- | --- | --- |
|  | time step |  | time increment in the simulations |
|  | region label |  | indexing regions |
|  | edge label |  | indexing edges |
|  | normal population  in region | N/A | total number of normal agents in region |
|  | misfolded population  in region | N/A | total number of misfolded agents in region |
|  | normal population  in edge | N/A | total number of normal agents in edge |
|  | misfolded population  in edge | N/A | total number of misfolded agents in edge |
|  | synthesis rate in region | where is the SNCA expression (z-score) in region | the probability that a new normal agent gets synthesized in each voxel of region per unit time |
|  | clearance rate in region | where is the GBA expression (z-score) in region | the probability that an existing agent (either normal or misfolded) in region gets cleared per unit time |
|  | region size | N/A | voxel counts of region |
|  | baseline transmission rate |  | the probability for a single misfolded agent to transmit the disease to other agents per unit time |
|  | transmission probability |  | the probability that normal agents get infected (by at least one of the misfolded agents) per unit time |
|  | connection strength of edge | normalized fiber tracts density between region and | determining the probability of entering edge when exiting region per unit time |
|  | edge length of edge | mean length of fiber tracts between region and | determining the probability of exiting edge per unit time |
|  | the probability of remaining in region | for all | agents in region have equal probability of remaining in region or exiting region per unit time |
|  | functional connectivity of edge | N/A | biasing agents toward regions showing greater co-activation pattern |
|  | weight of functional connectivity | N/A | controlling the influence of functional connectivity in driving disease spread |
|  | weight of atrophy accrual due to accumulation of misfolded agents |  | controlling the contribution of native misfolded agents to total atrophy growth |
|  | weight of atrophy accrual due to deafferentation |  | controlling the contribution of deafferentation to total atrophy growth |
|  | the ratio of misfolded agents in region |  | measuring the burden of misfolded agents in region at time |
